# Supplementary material for: Defining the biological basis of radiomic phenotypes in lung cancer
Source: PubMed Central journal article supplement (PMC5590809; doi:10.7554/elife.23421), 2017-07-21

Color Key and Histogram

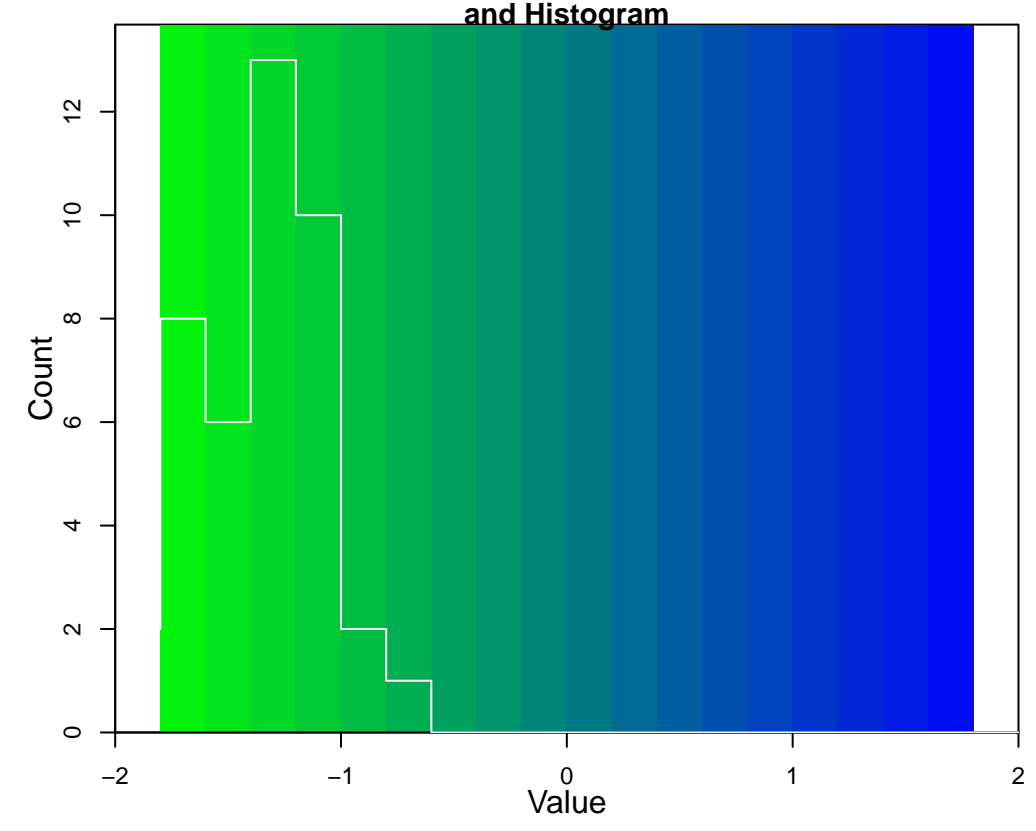

M1\_module1

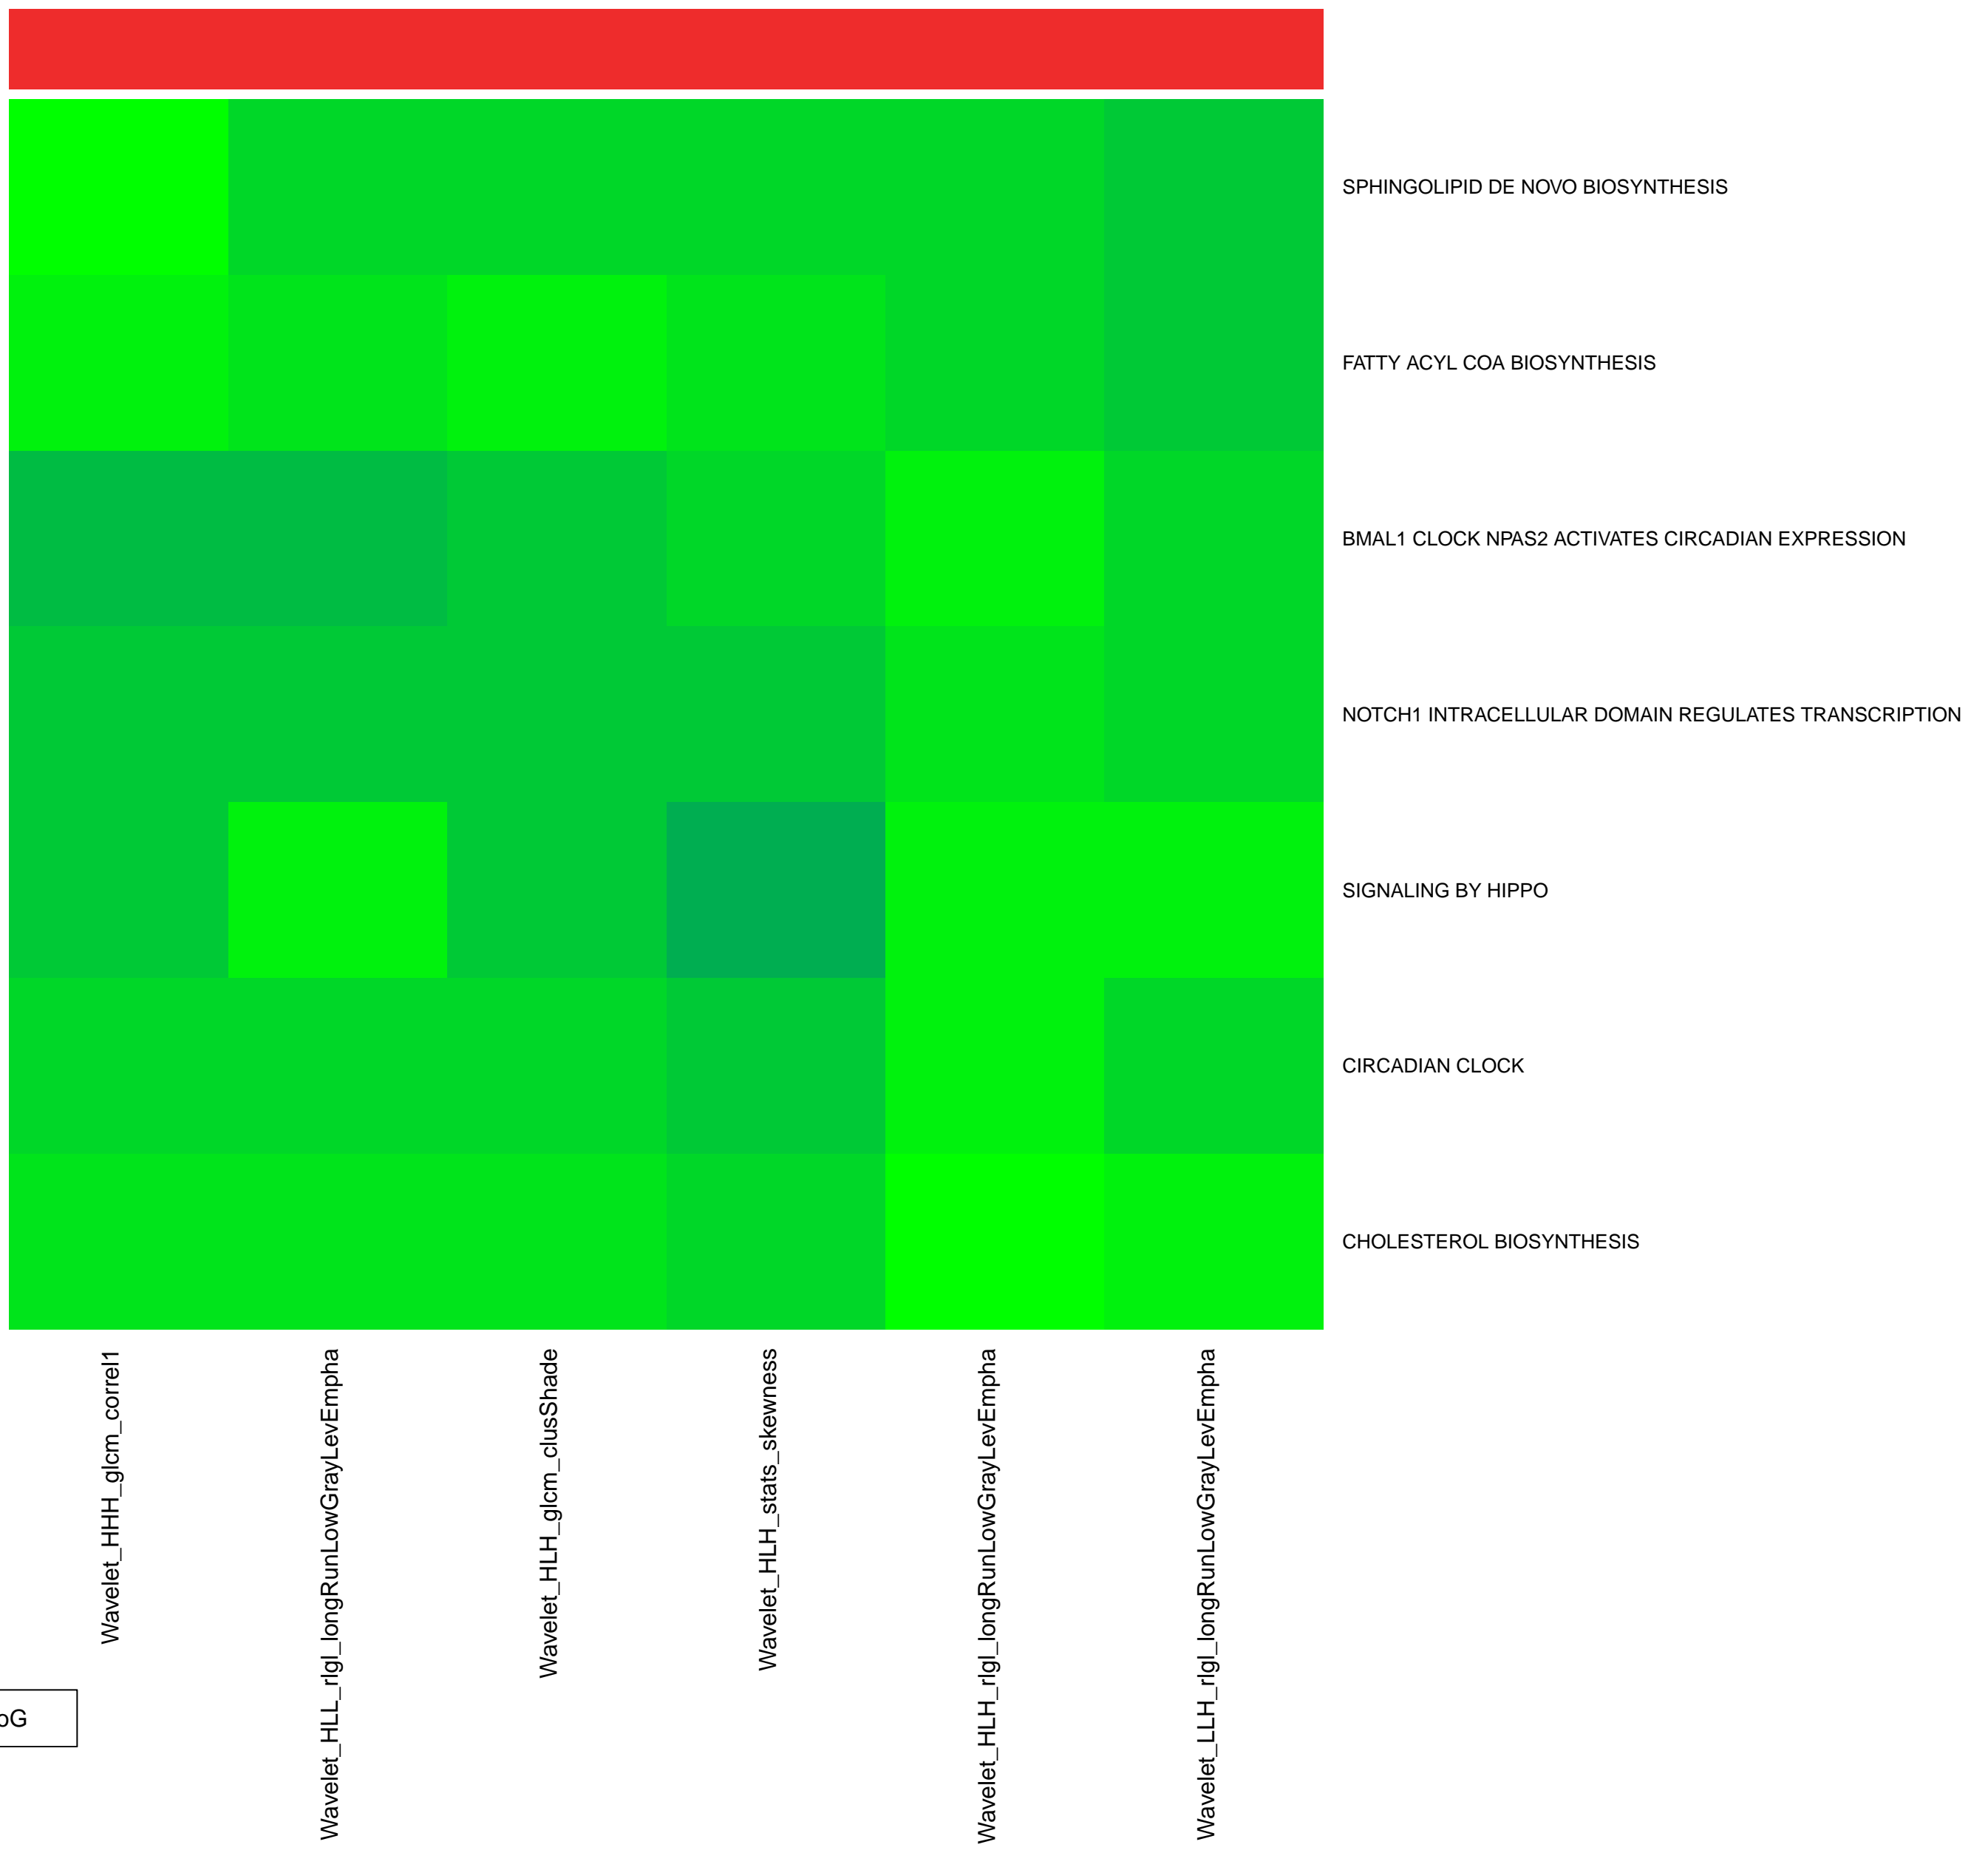

Stats Texture Shape Wavelet LoG

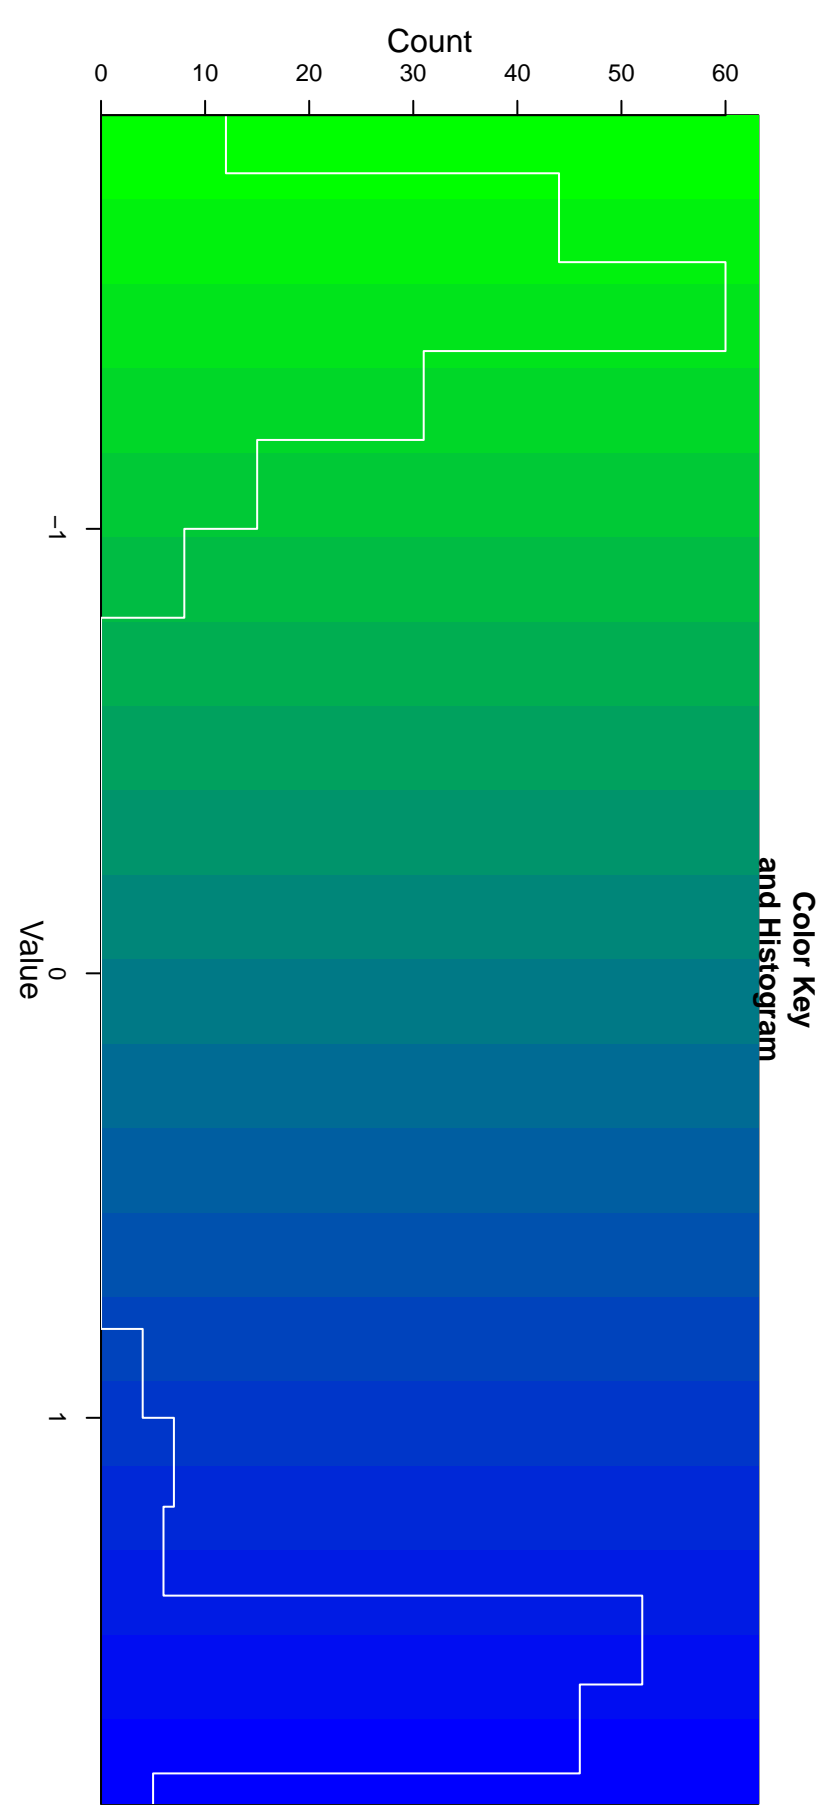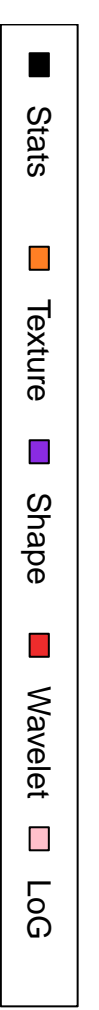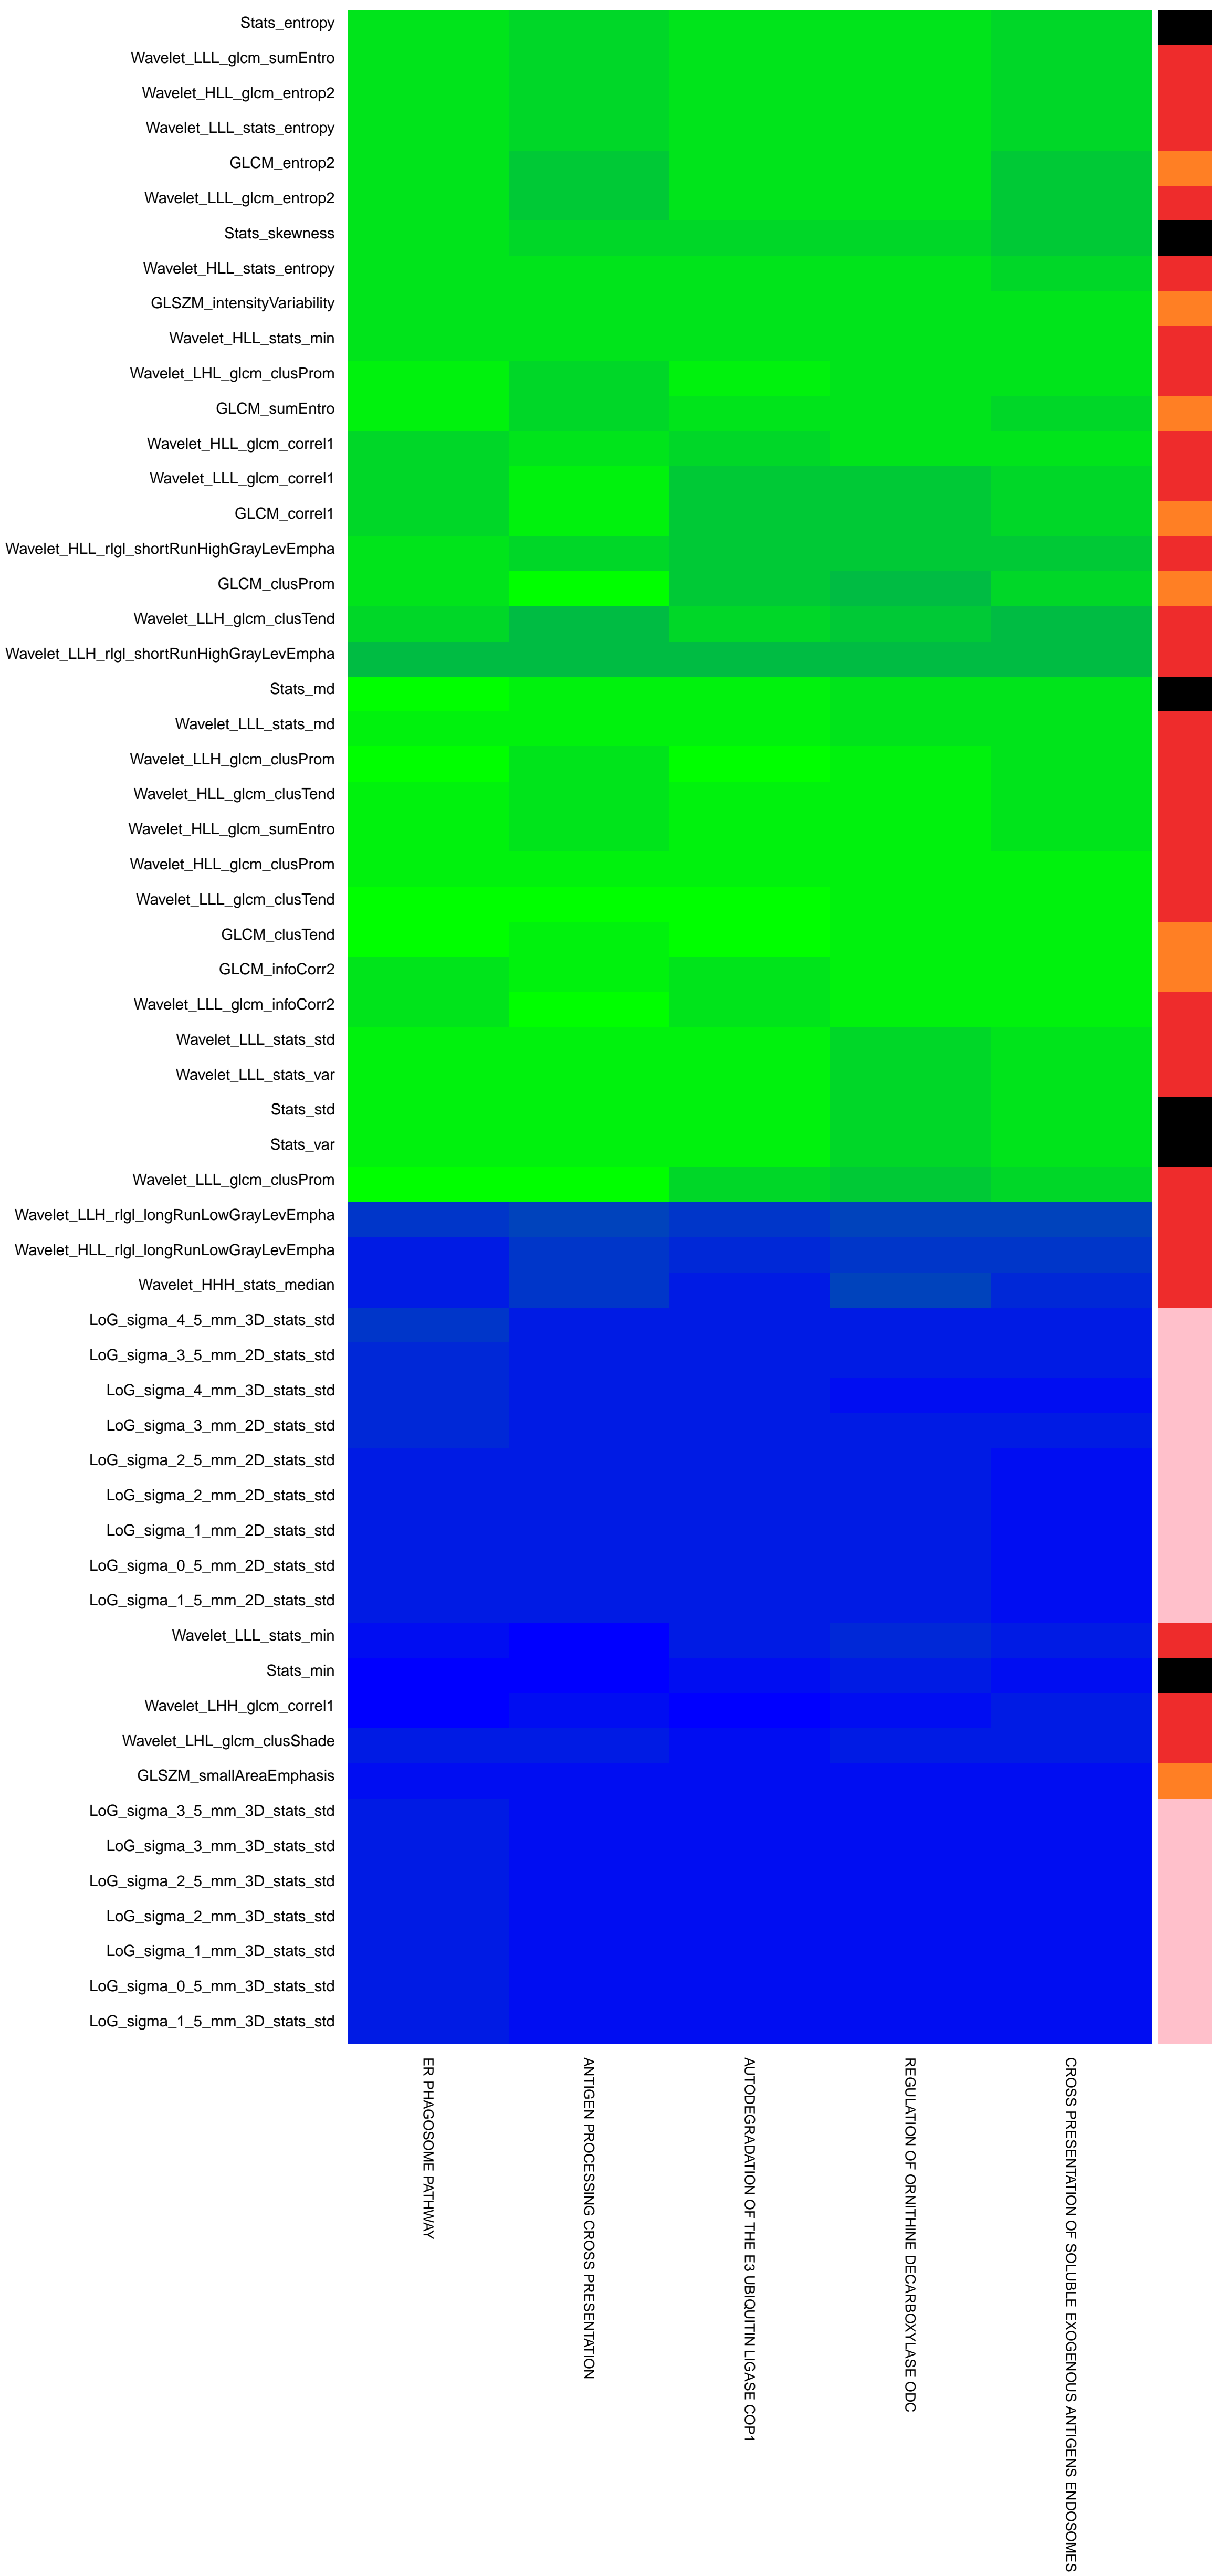

M2\_module2

Color Key  
and Histogram

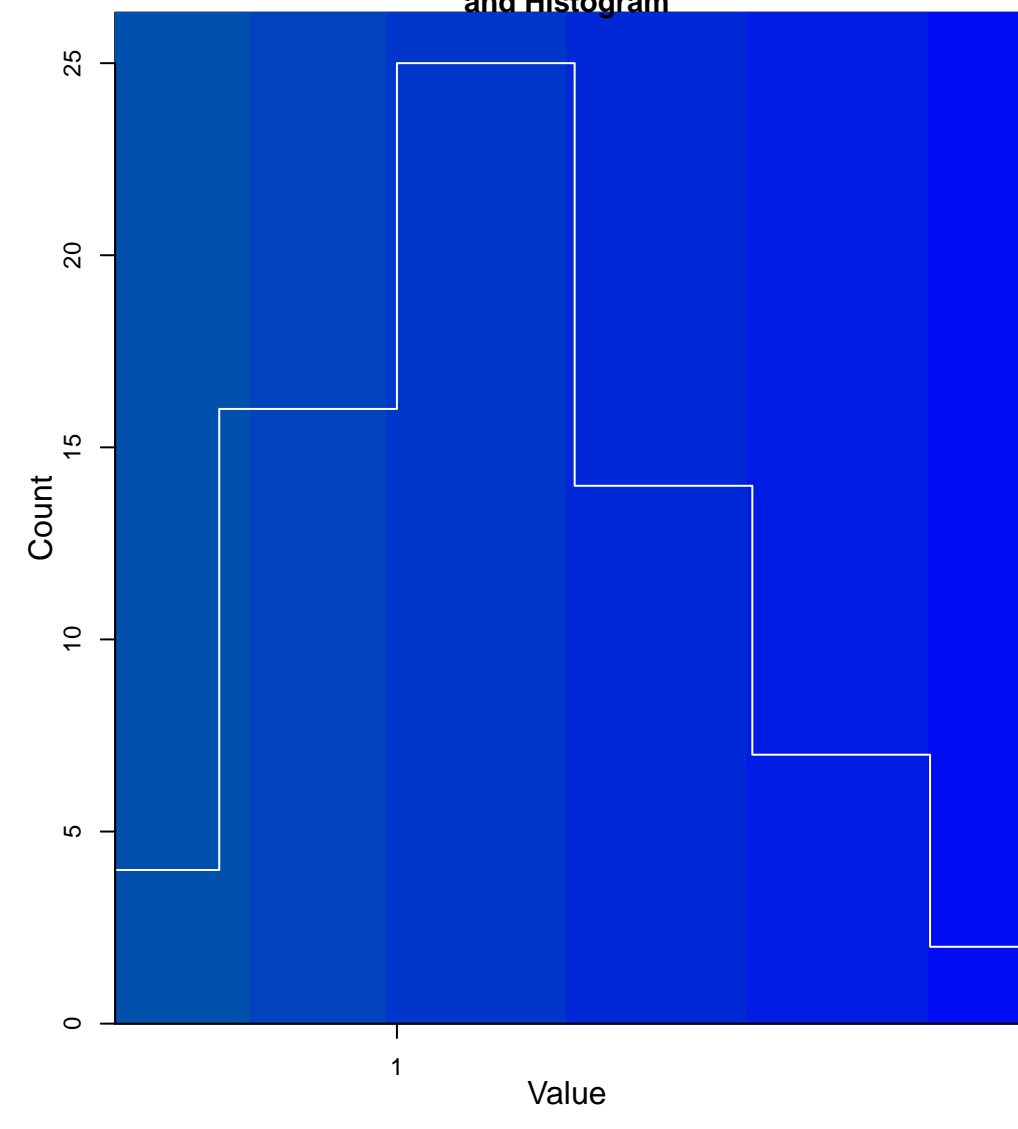

M3\_module3

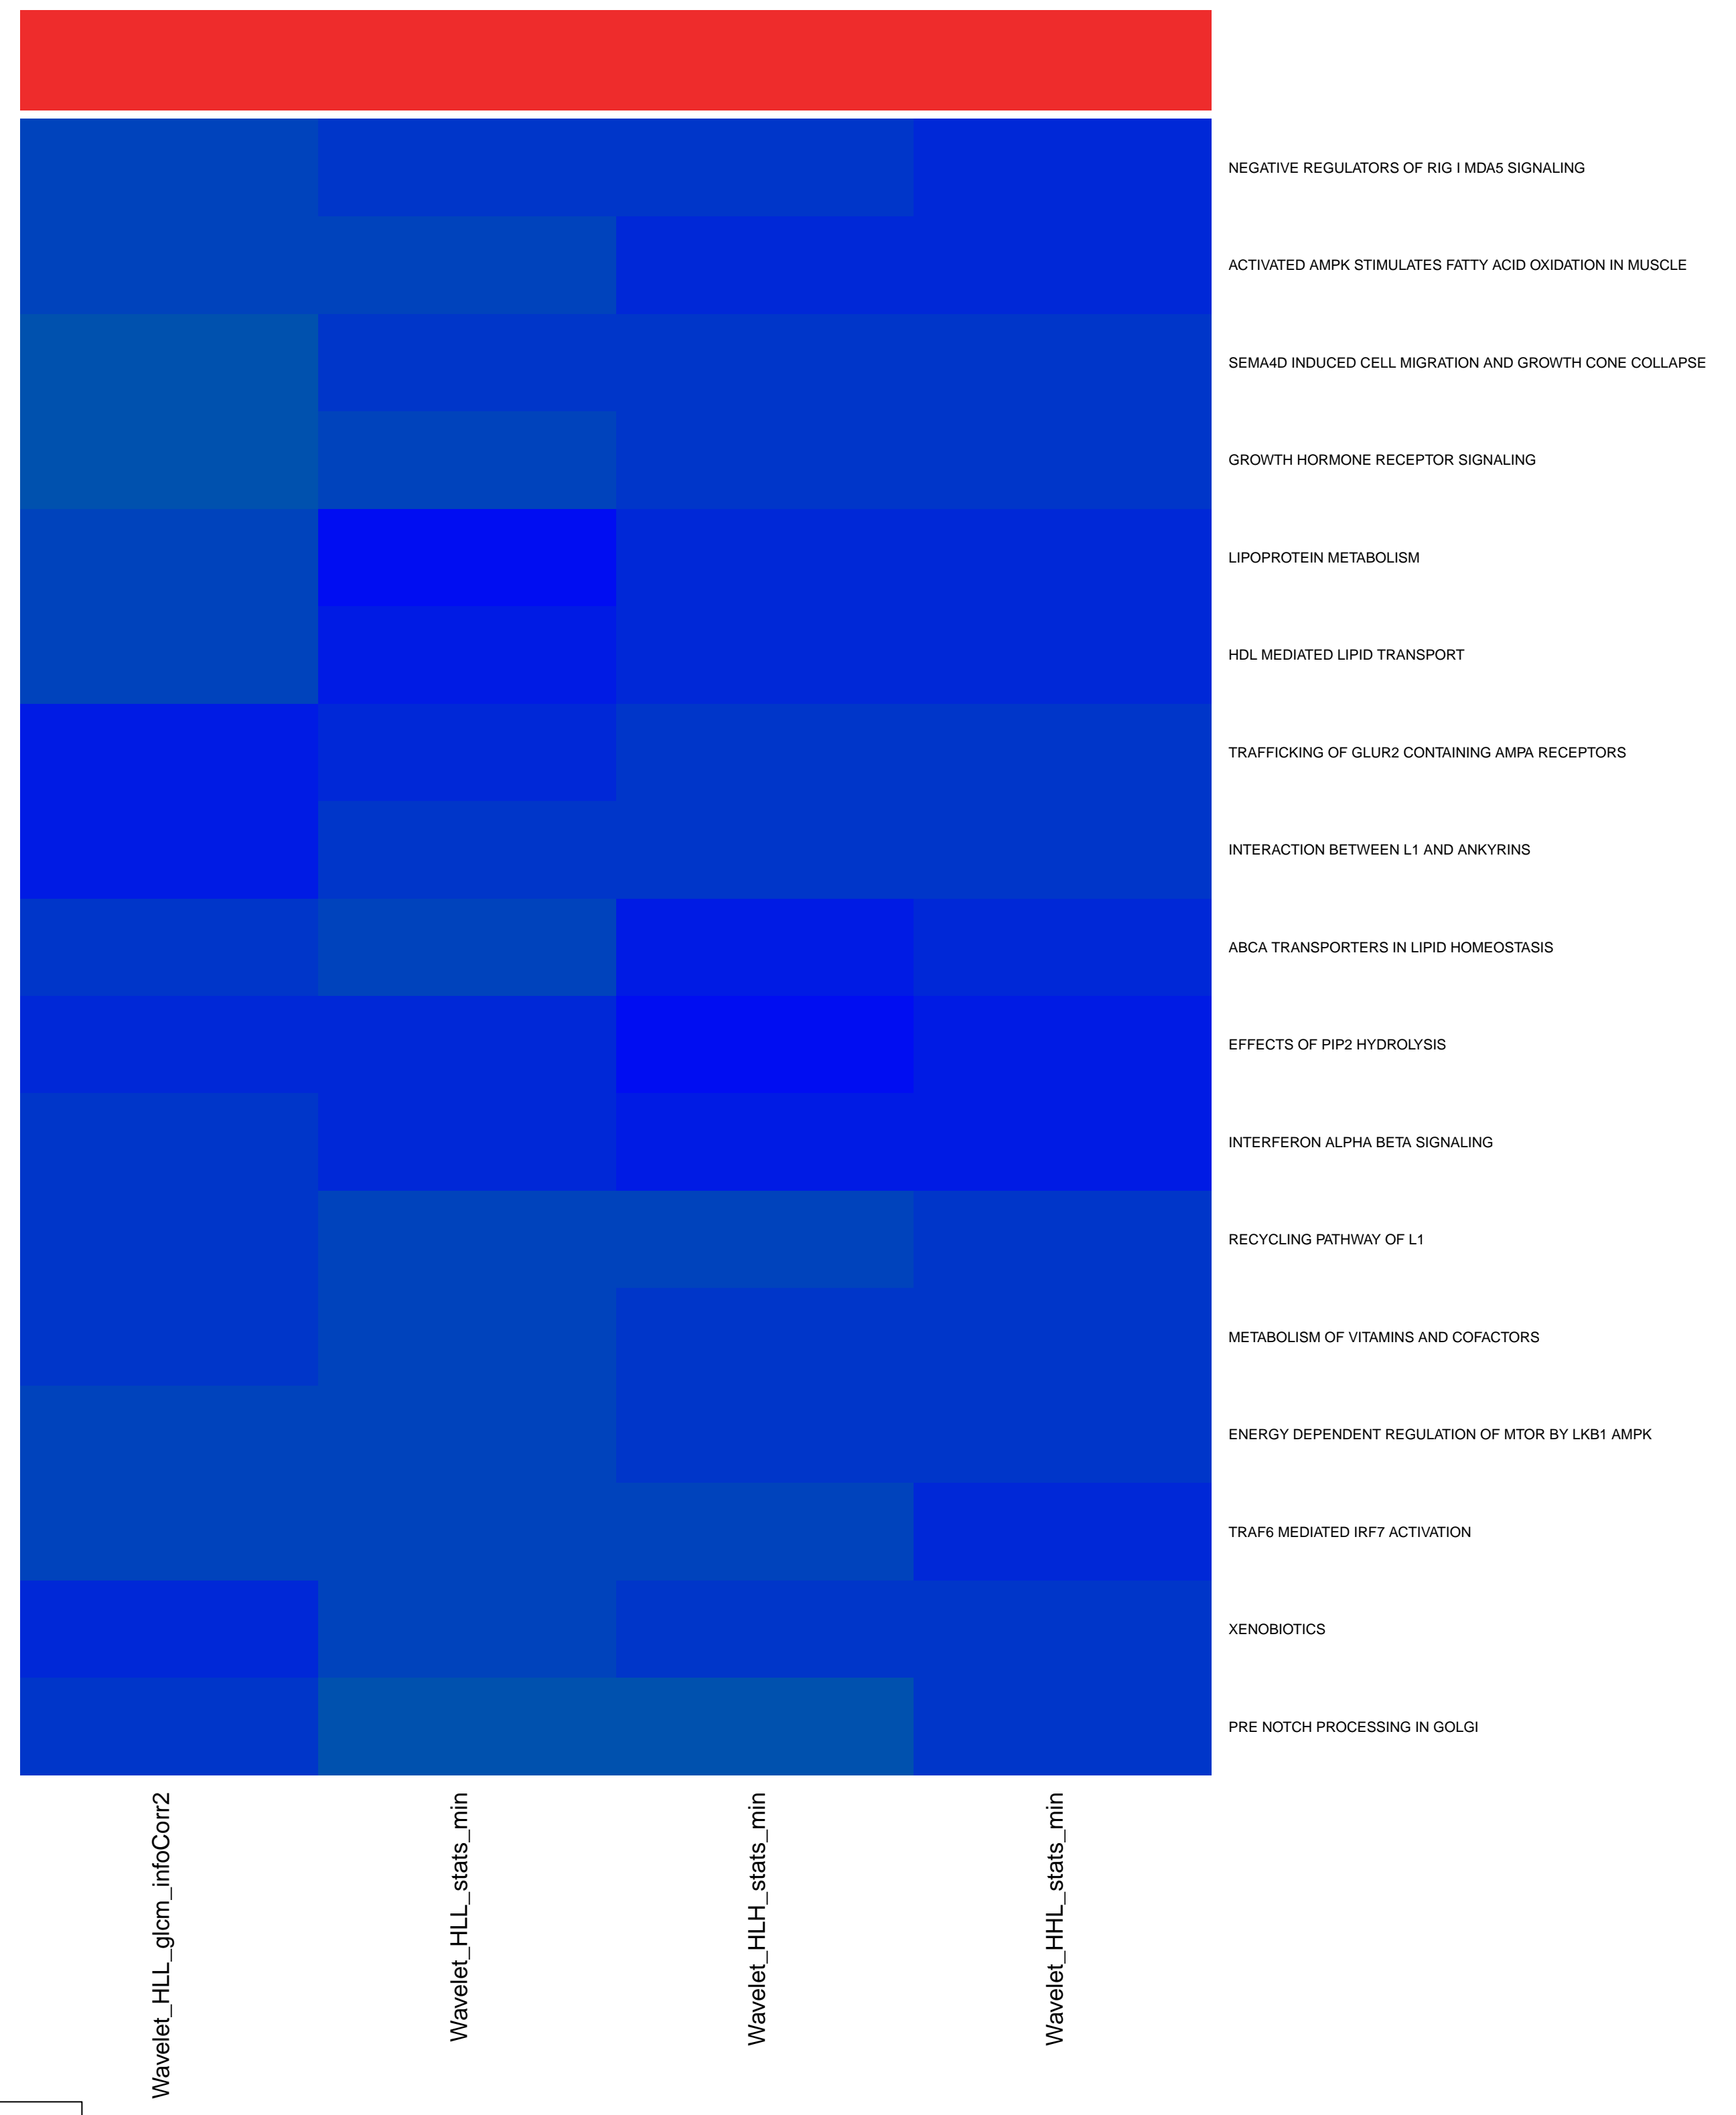

■ Stats ■ Texture ■ Shape ■ Wavelet ■ LoG

Color Key  
and Histogram

M4\_module4

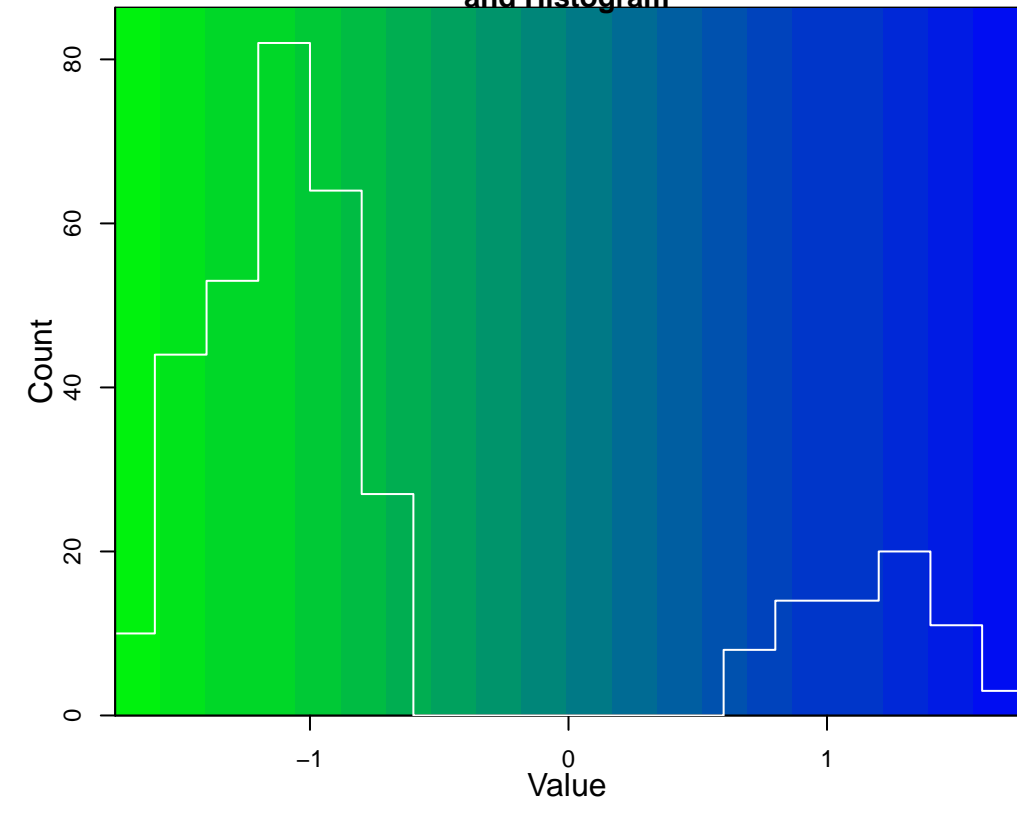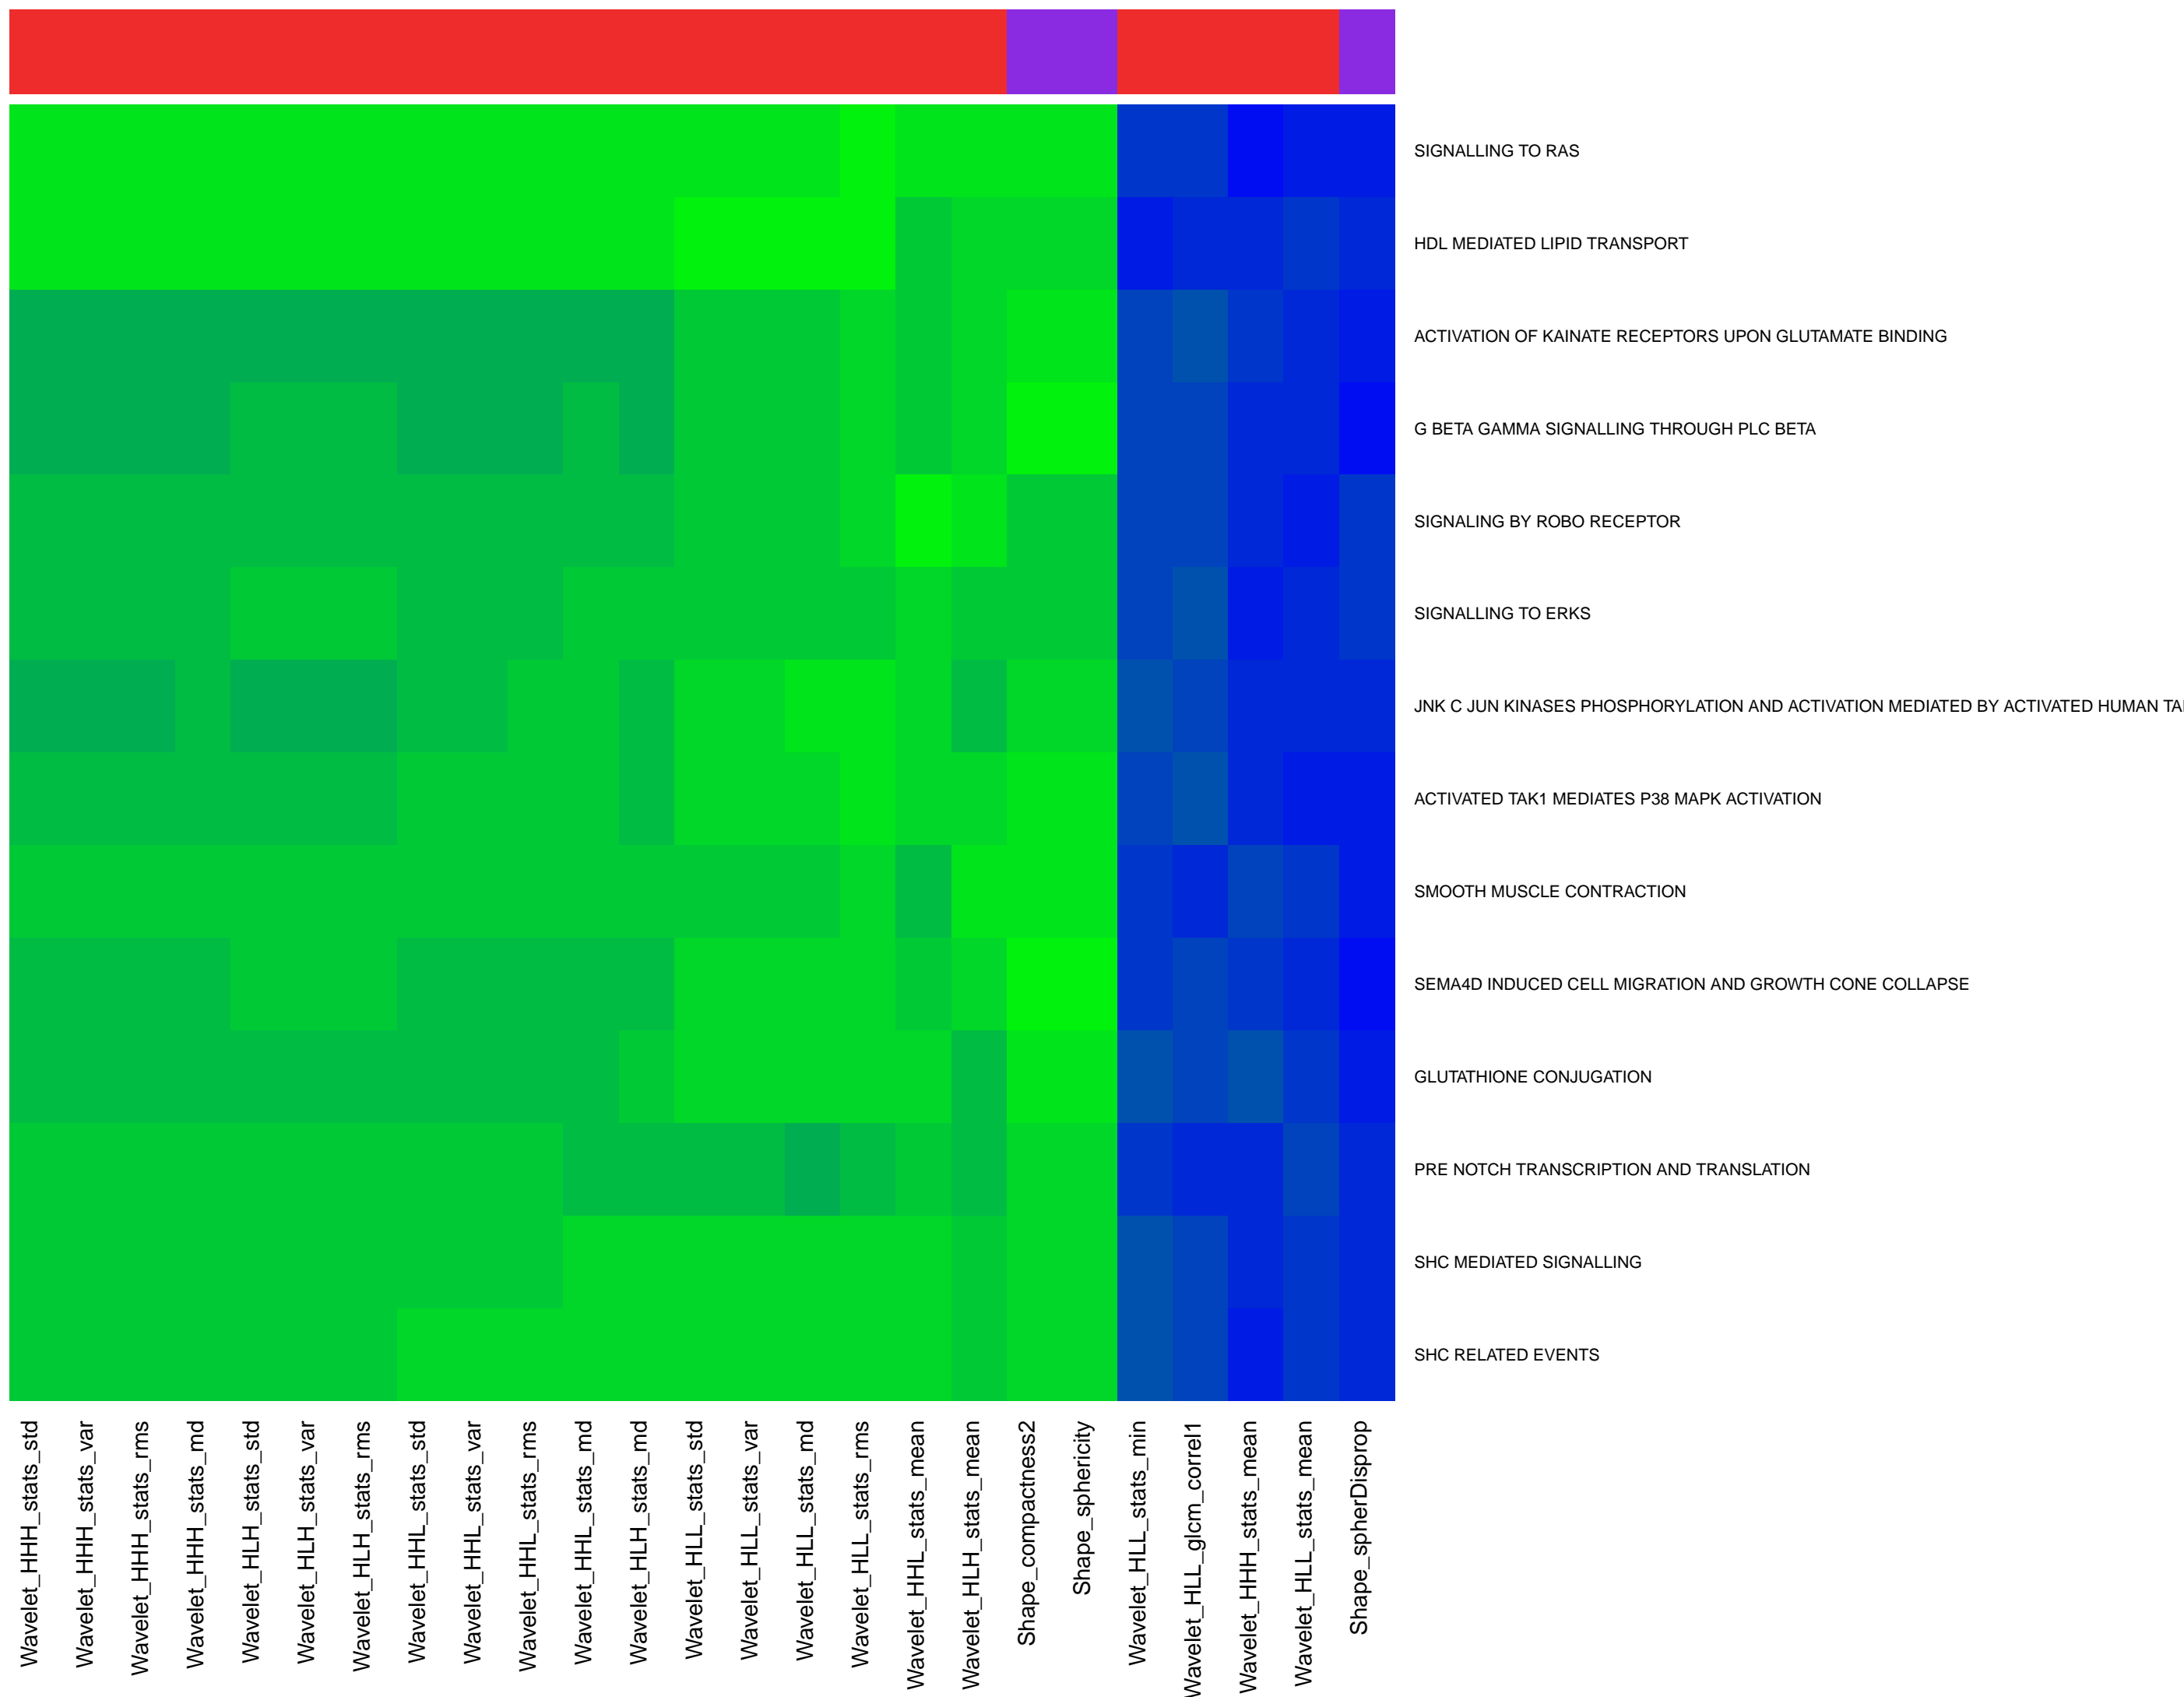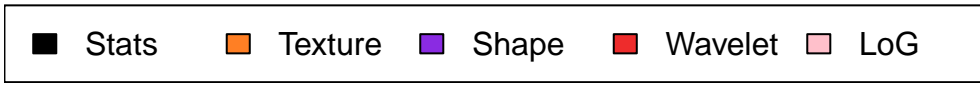

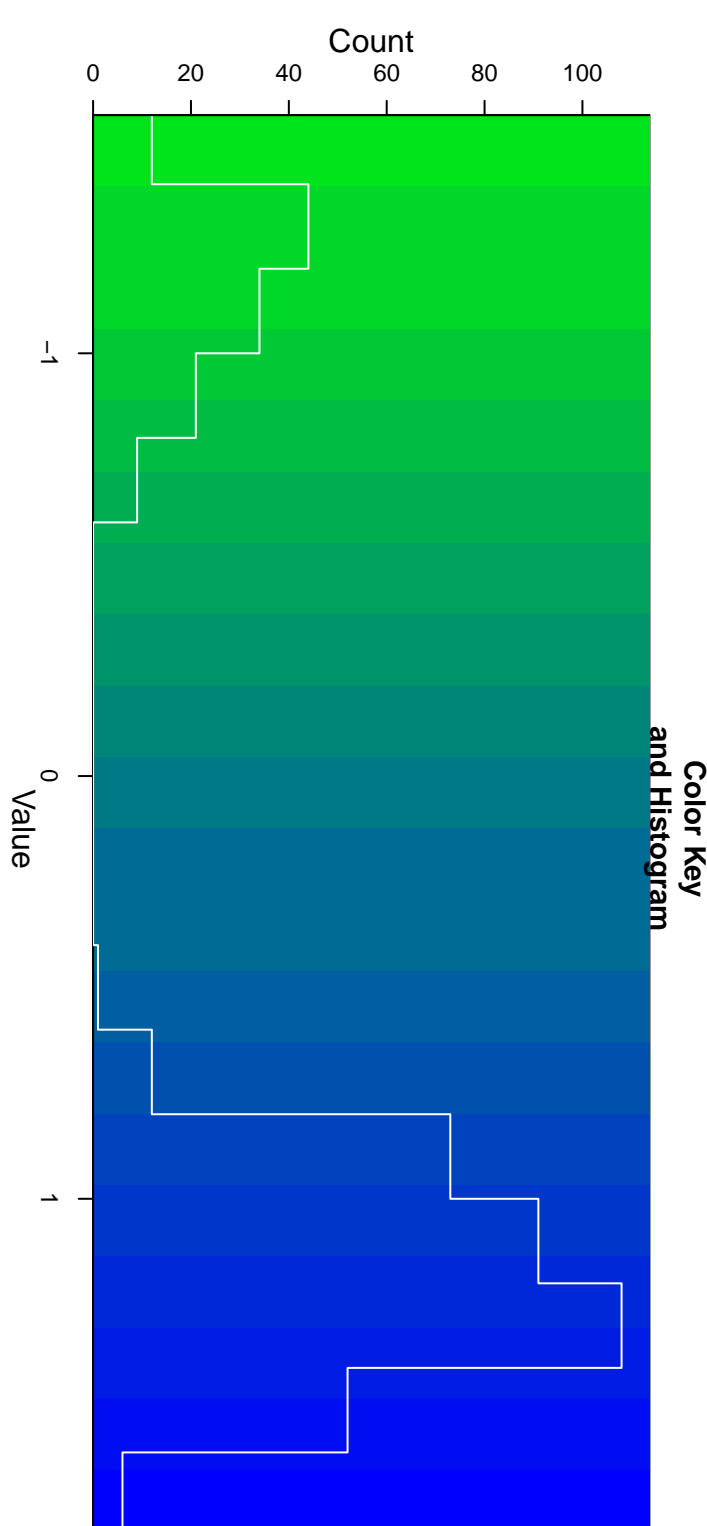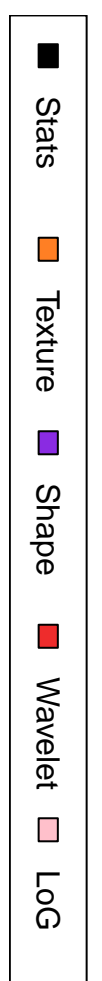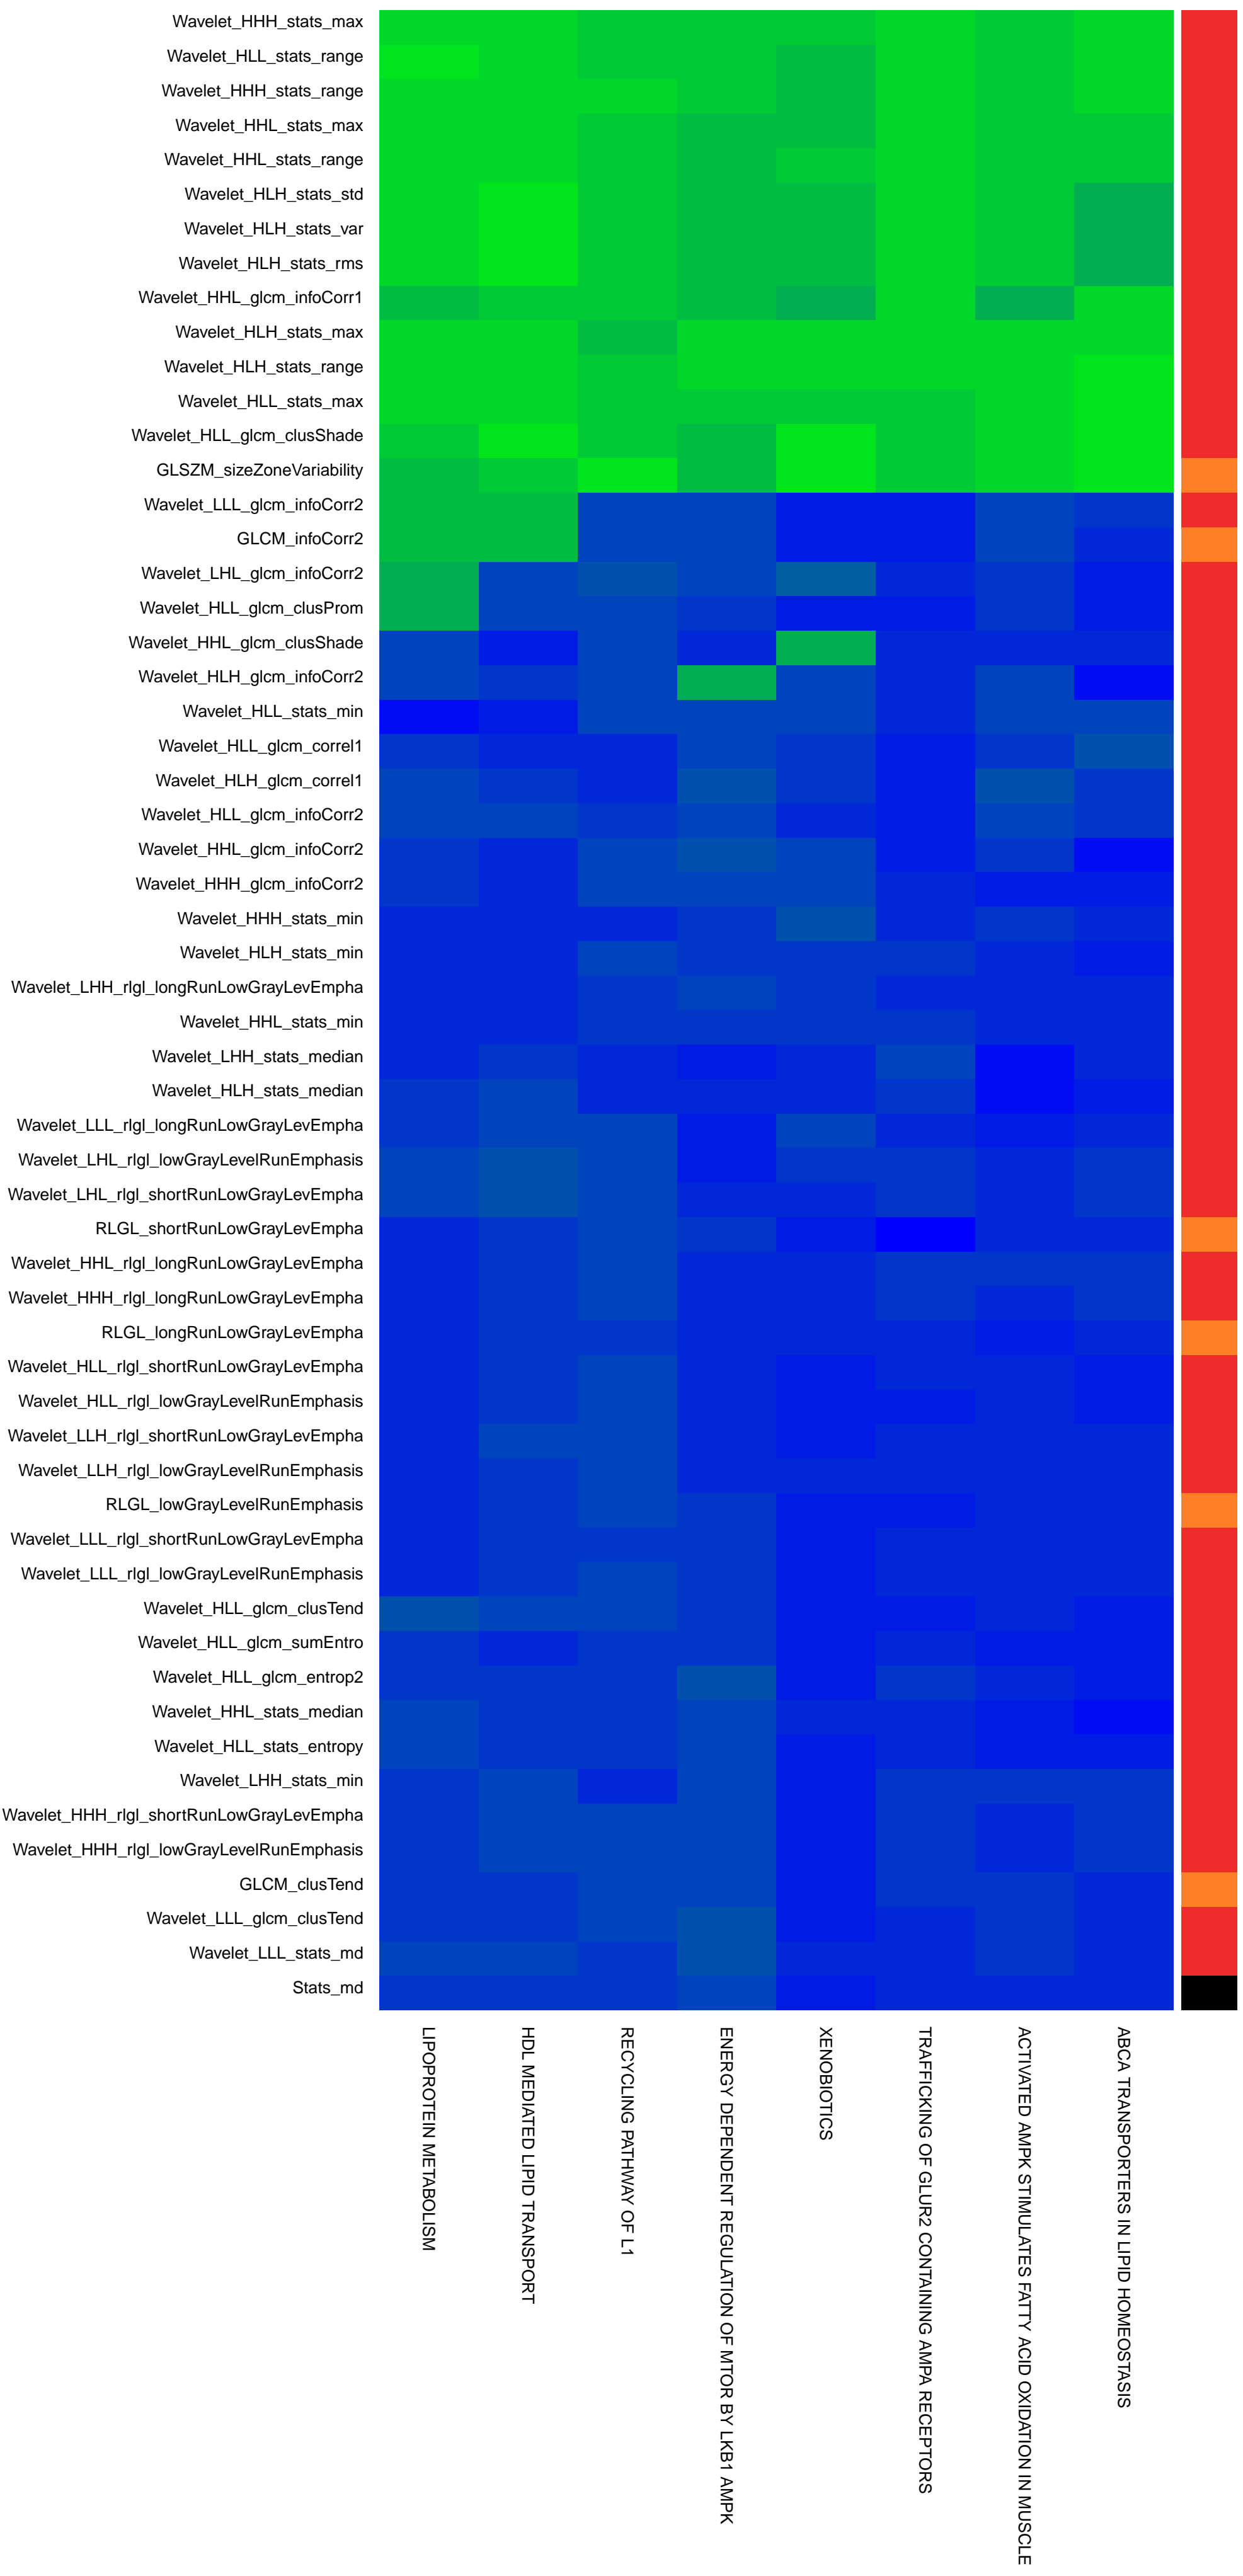

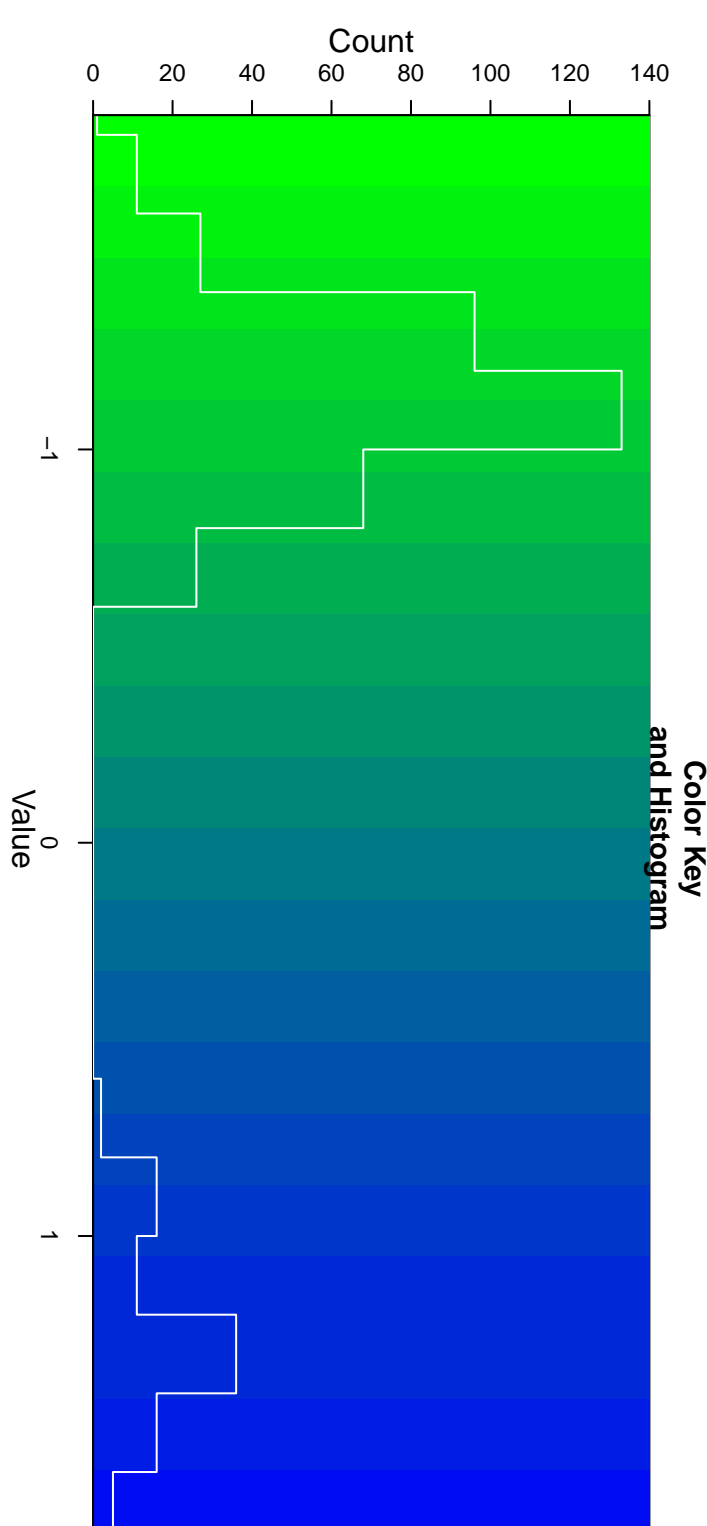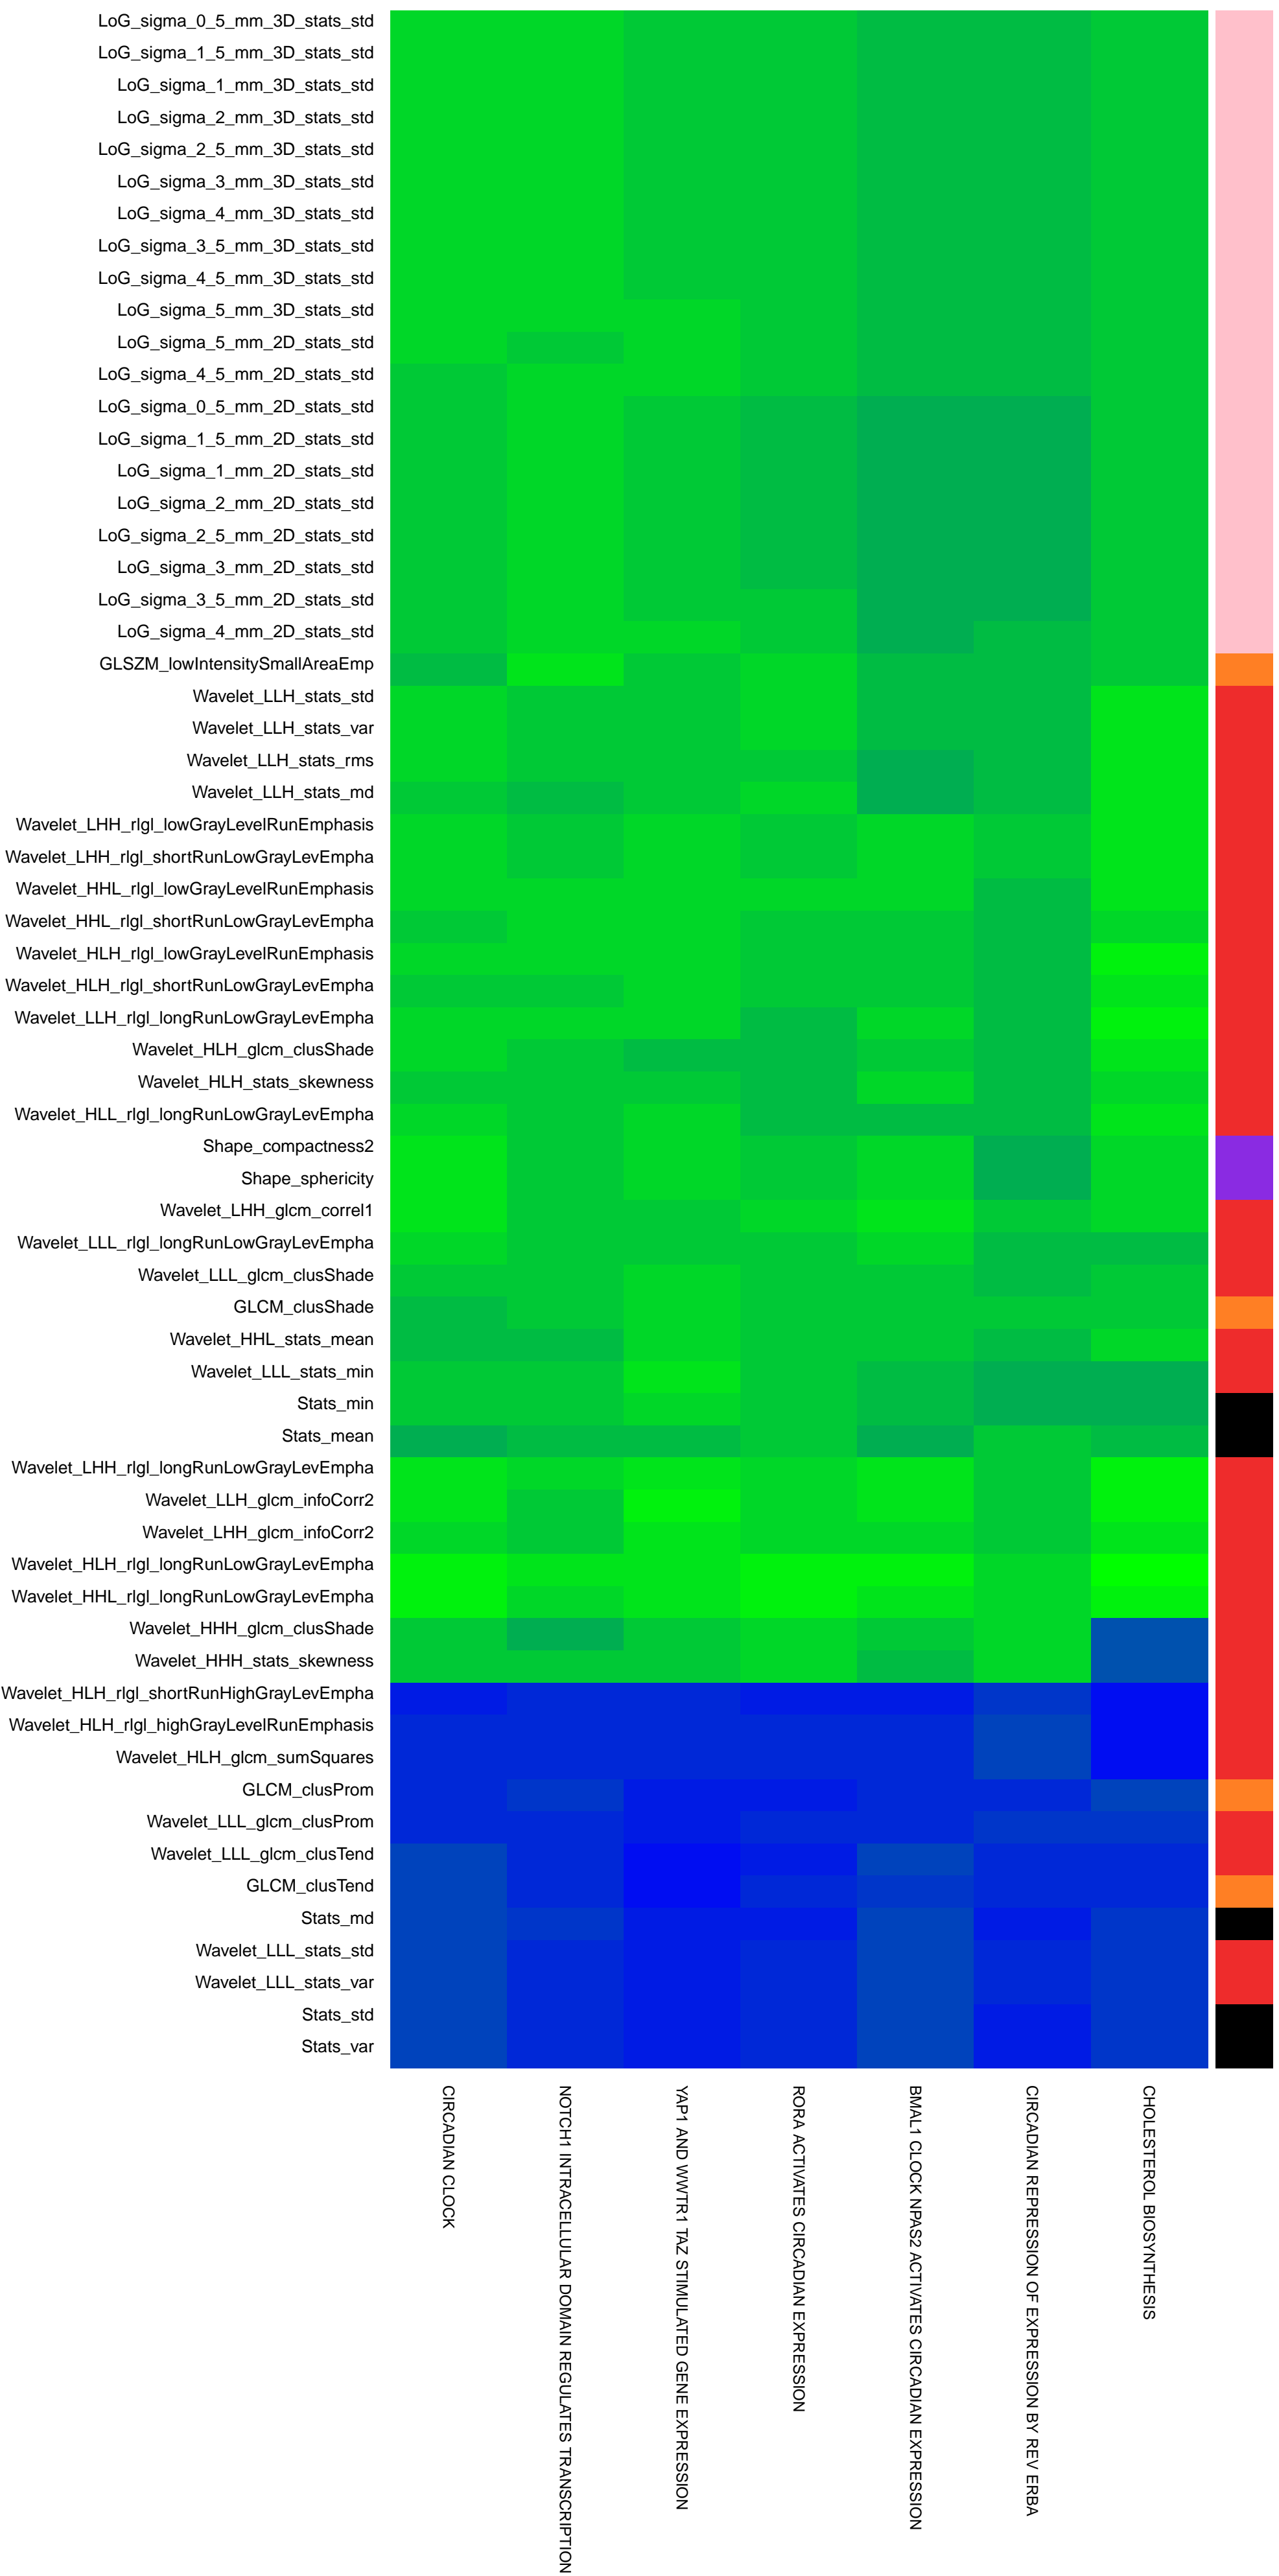

M6\_module6

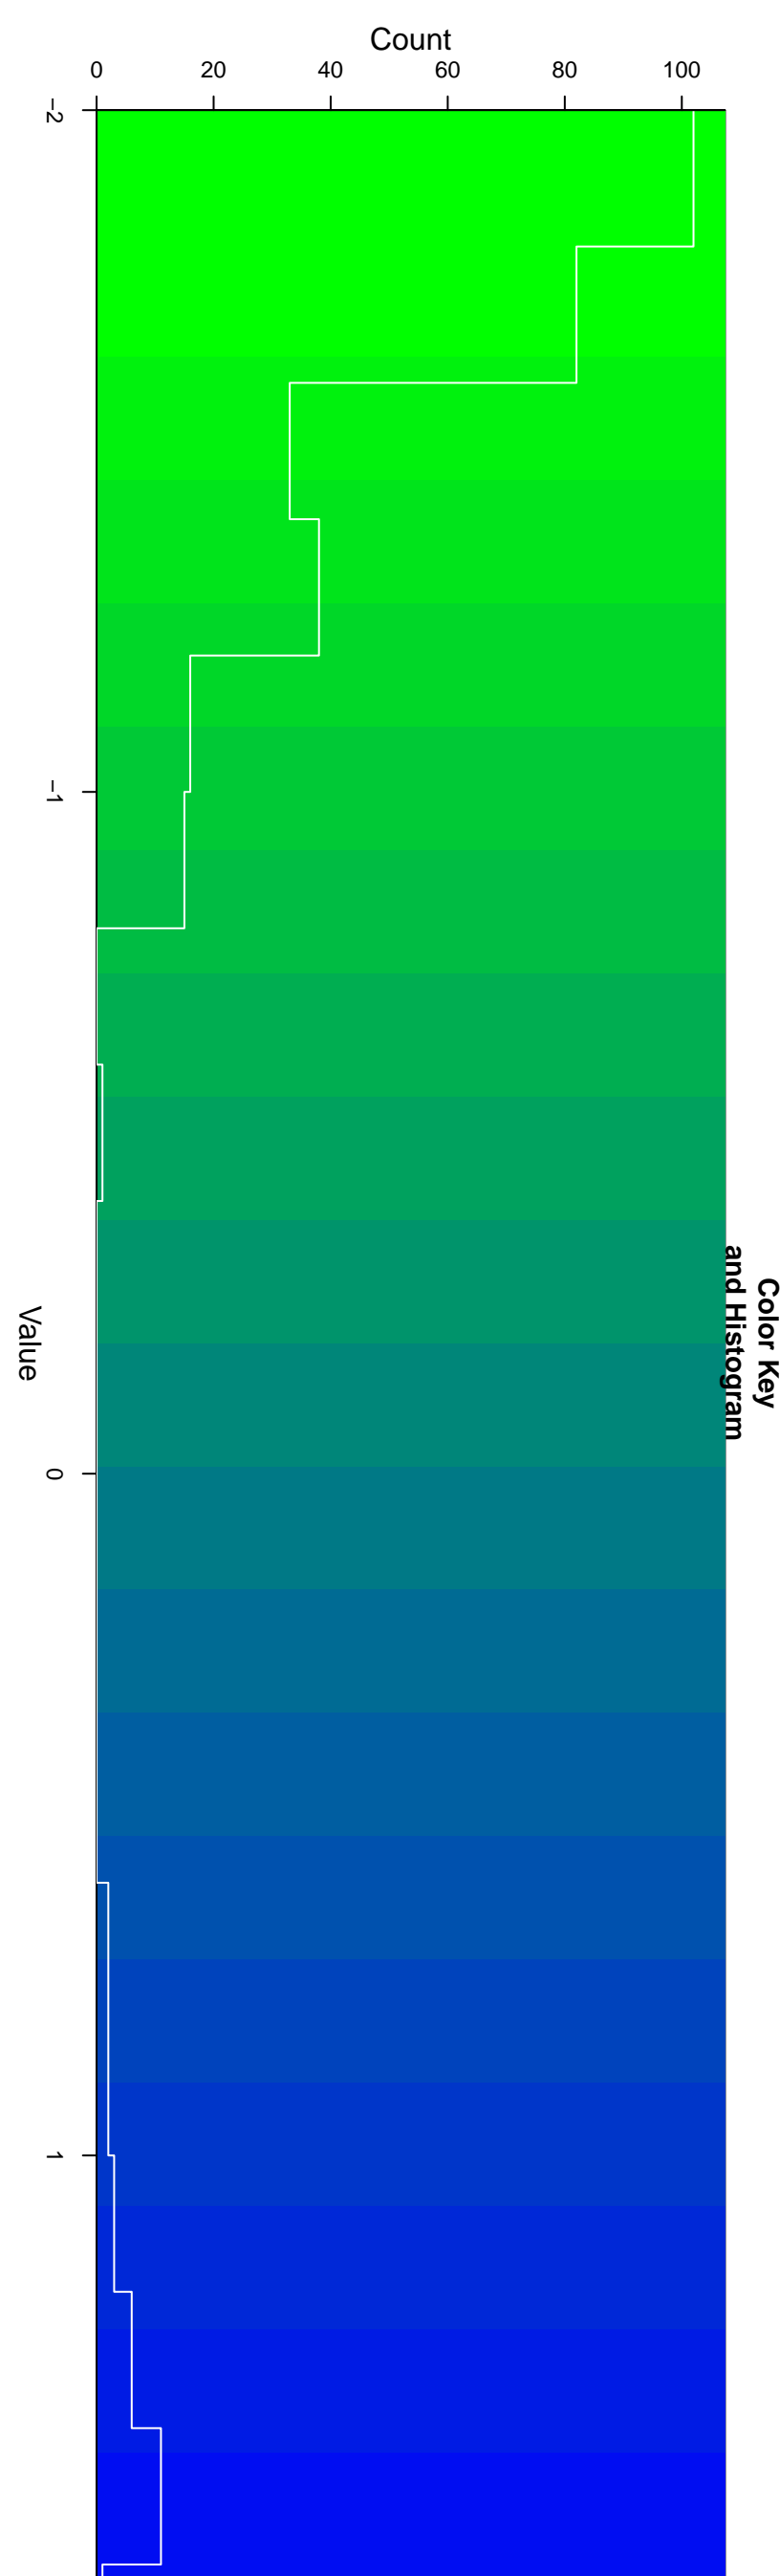

MZ\_module7

- Stats
- Texture
- Shape
- Wavelet
- LoG

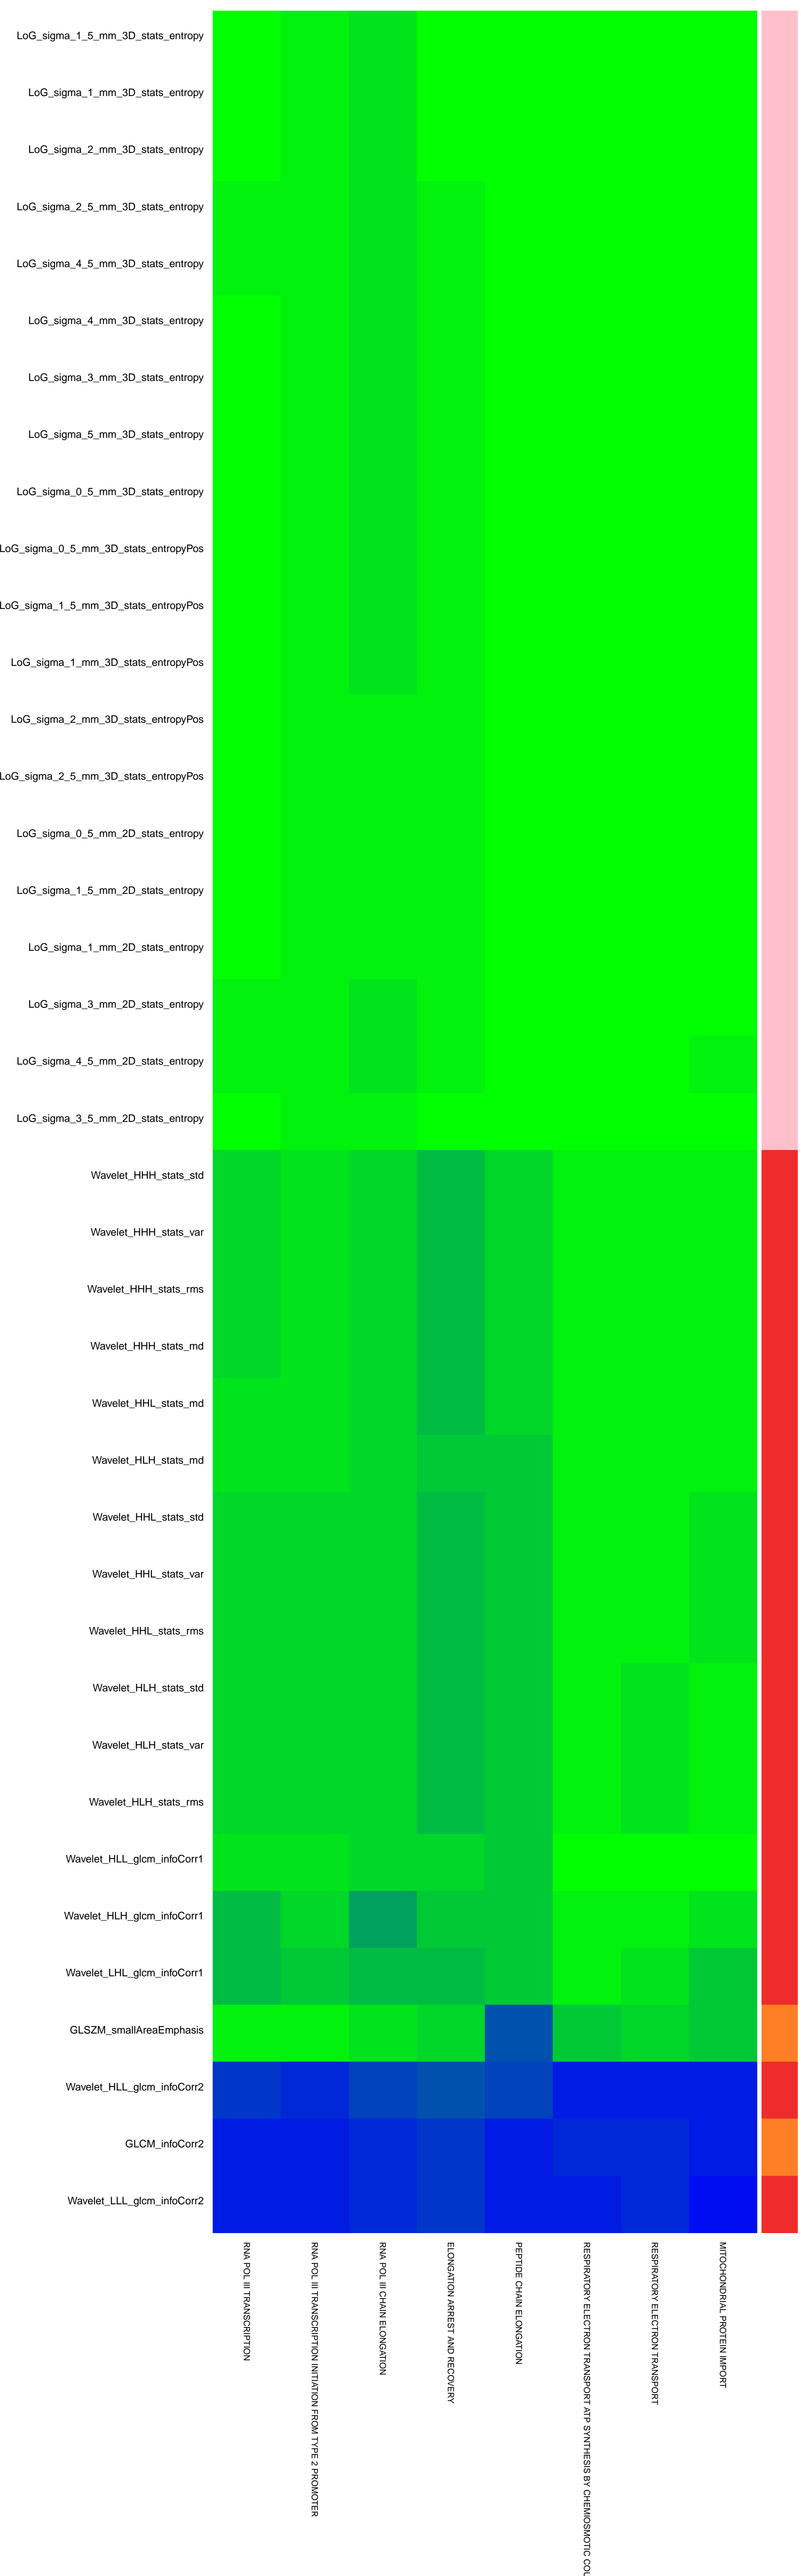

Color Key  
and Histogram

M8\_module8

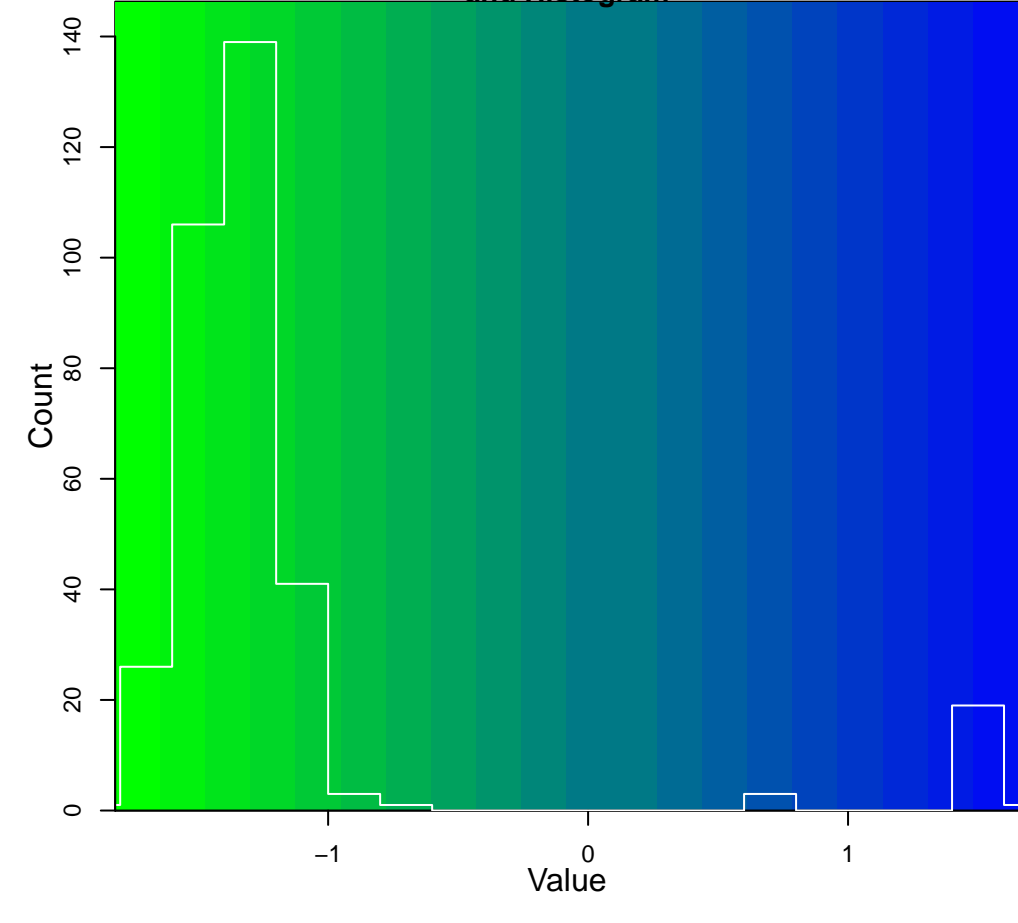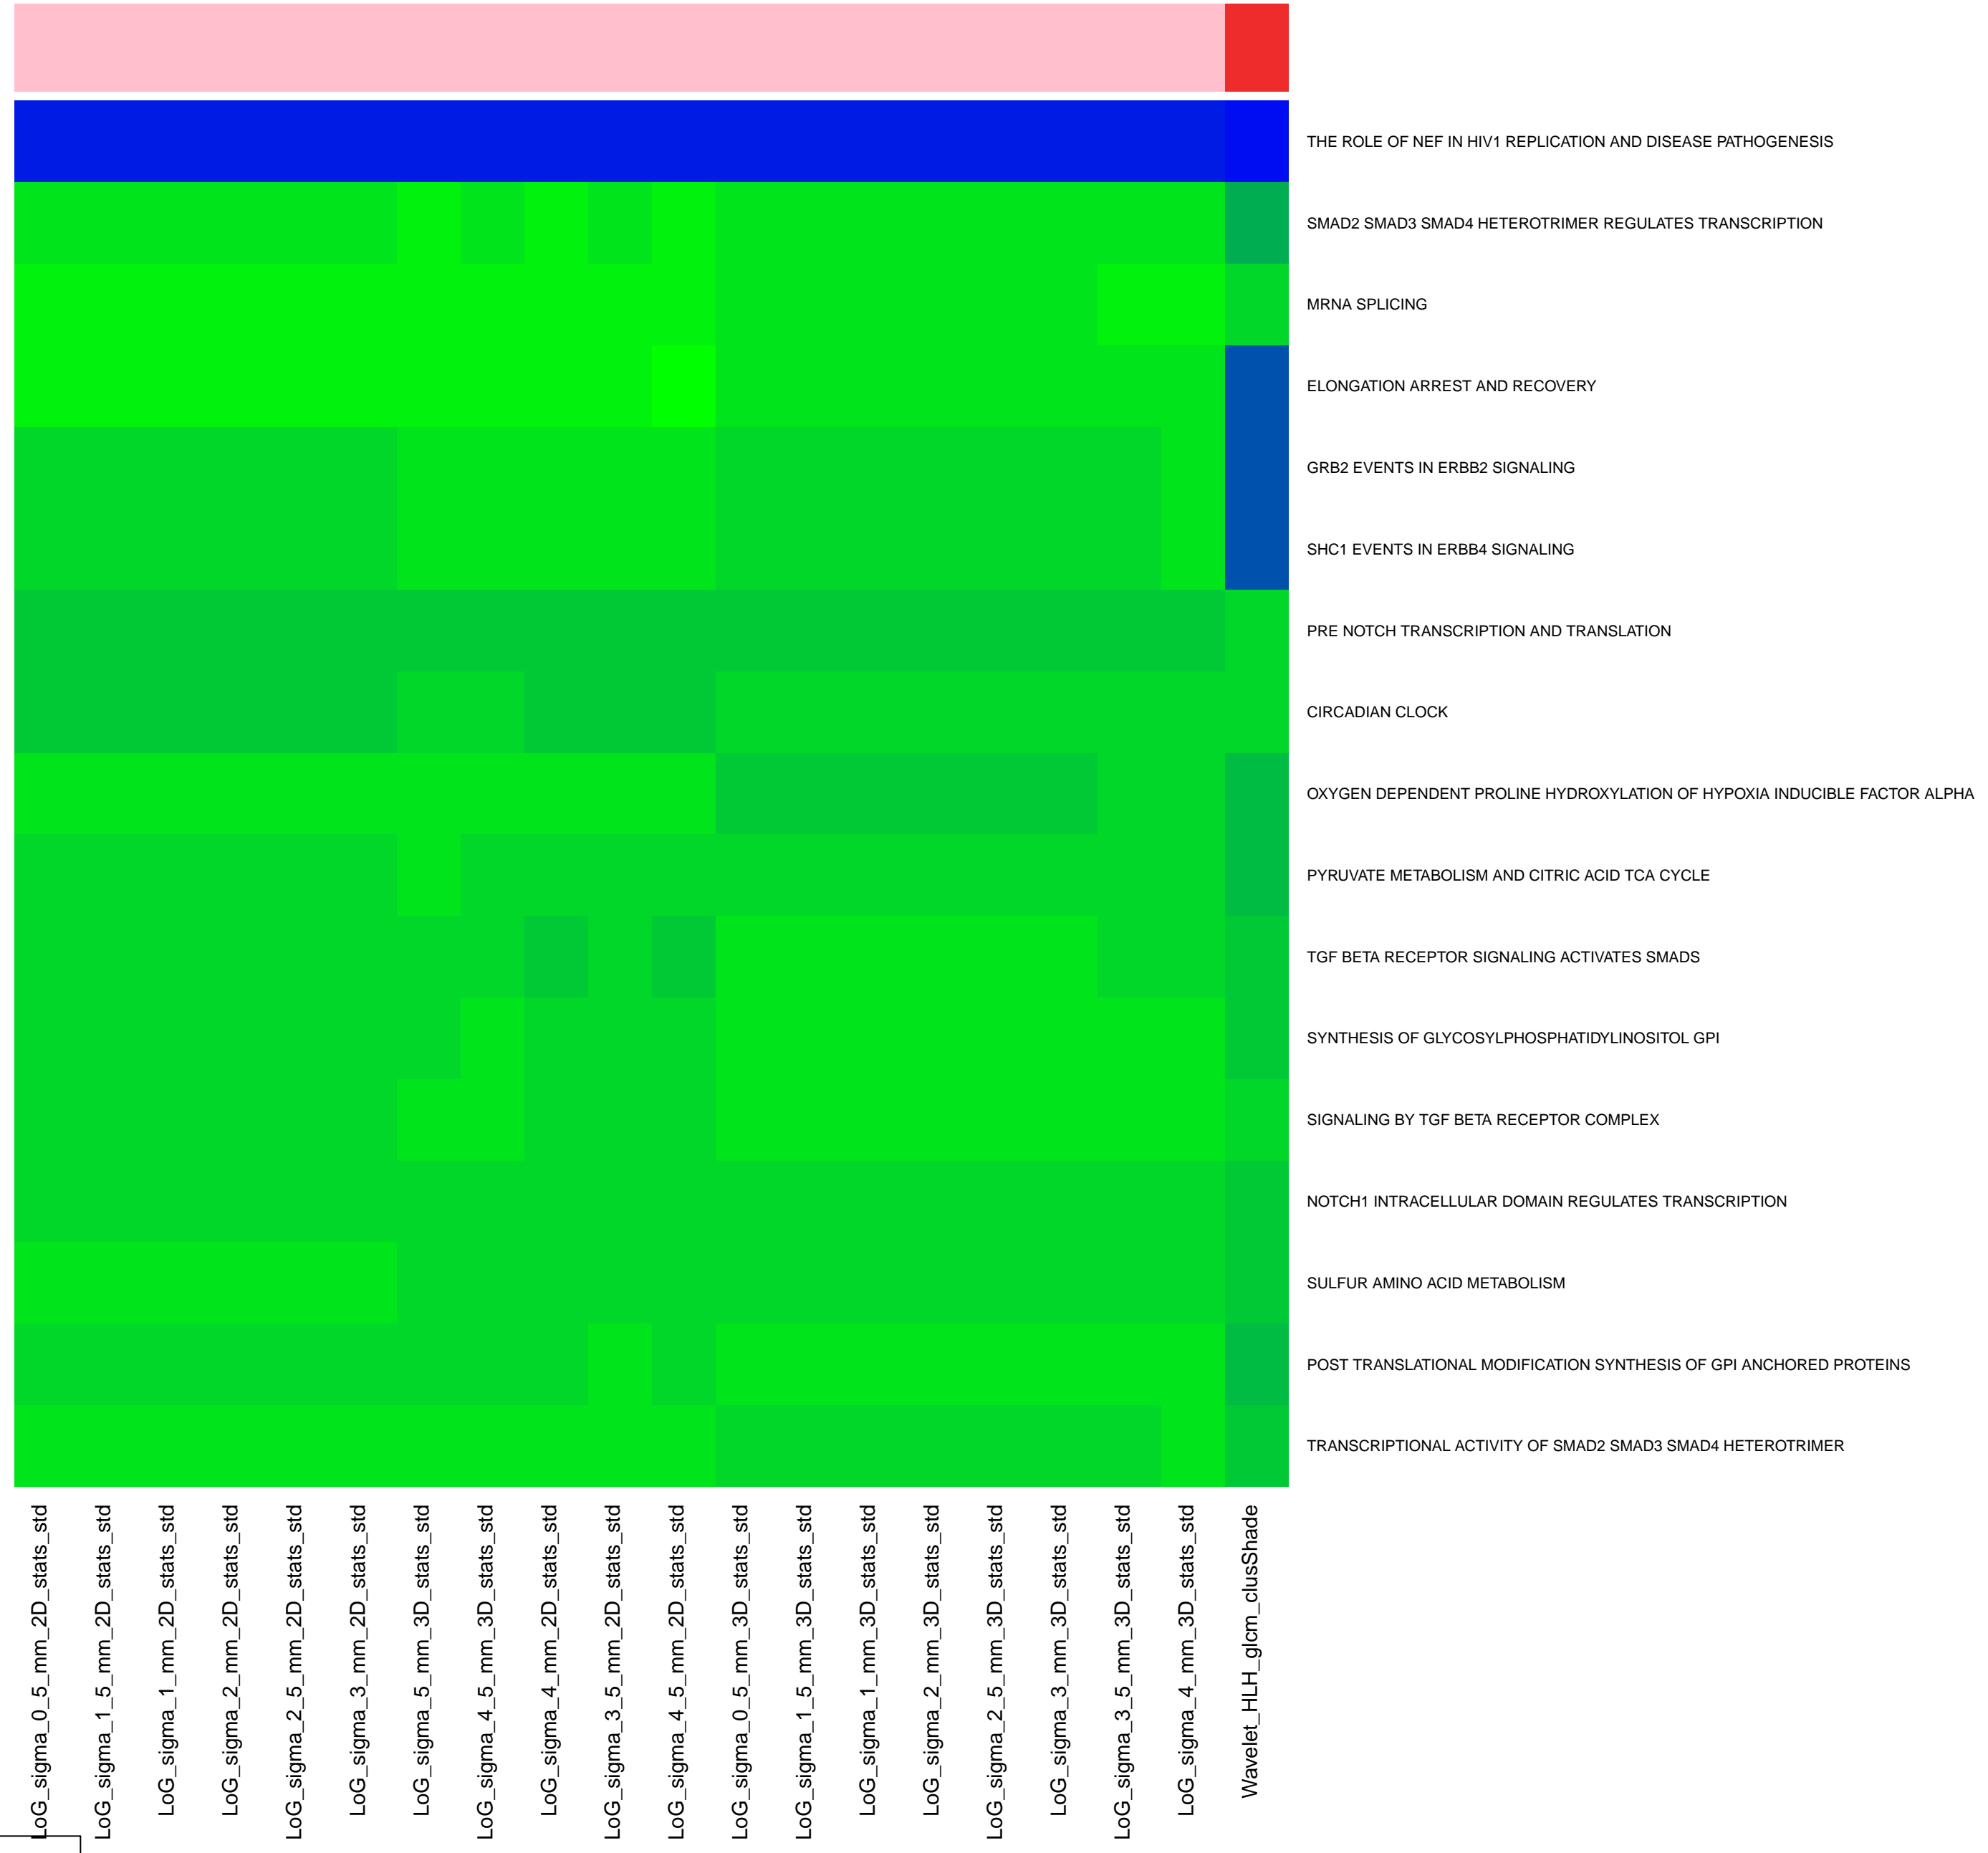

Stats Texture Shape Wavelet LoG



Color Key and Histogram

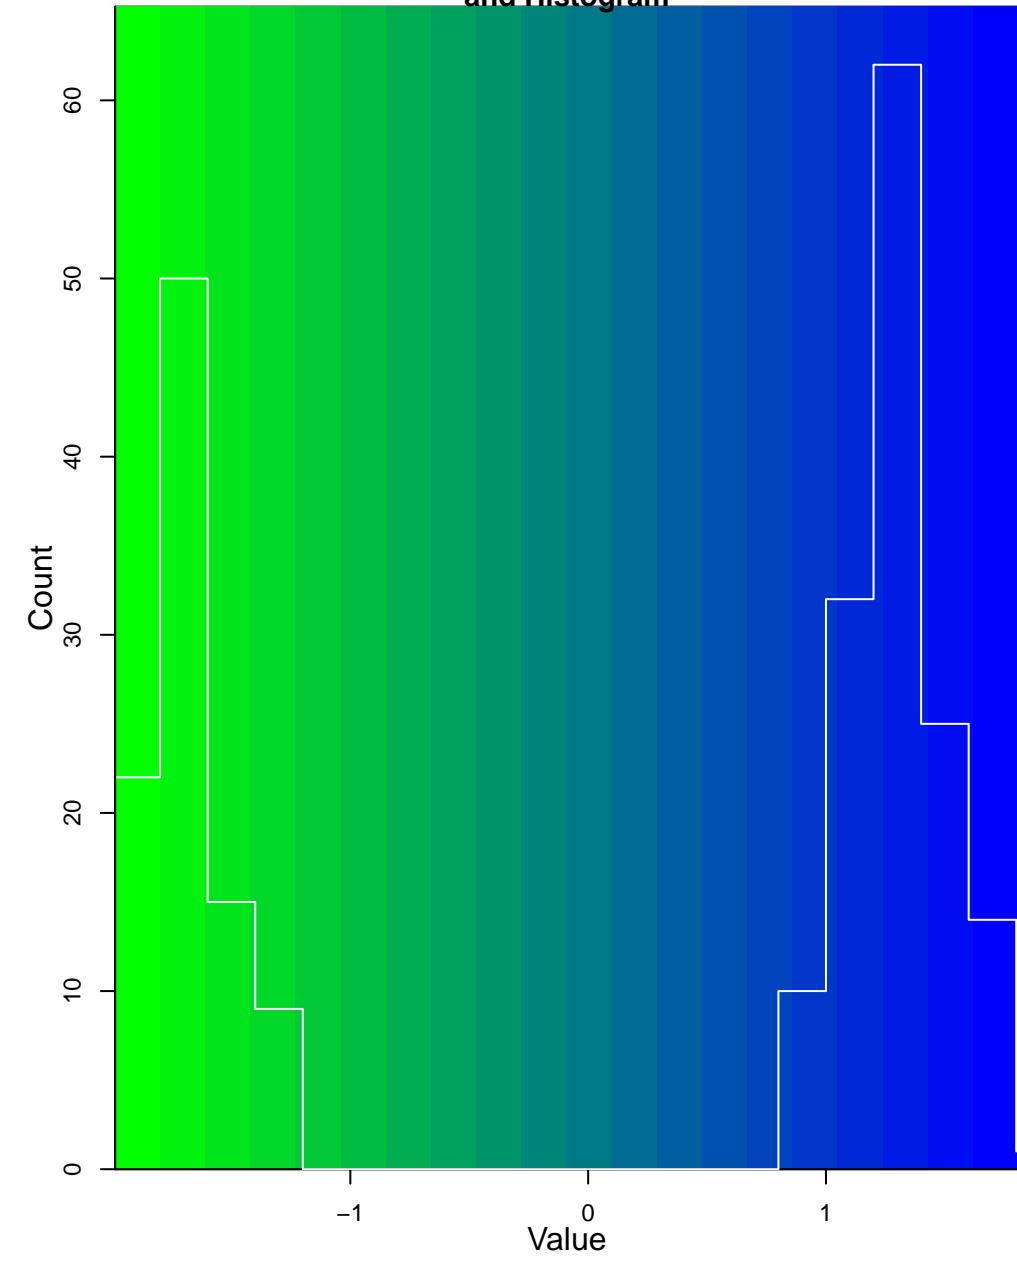

M9\_module9

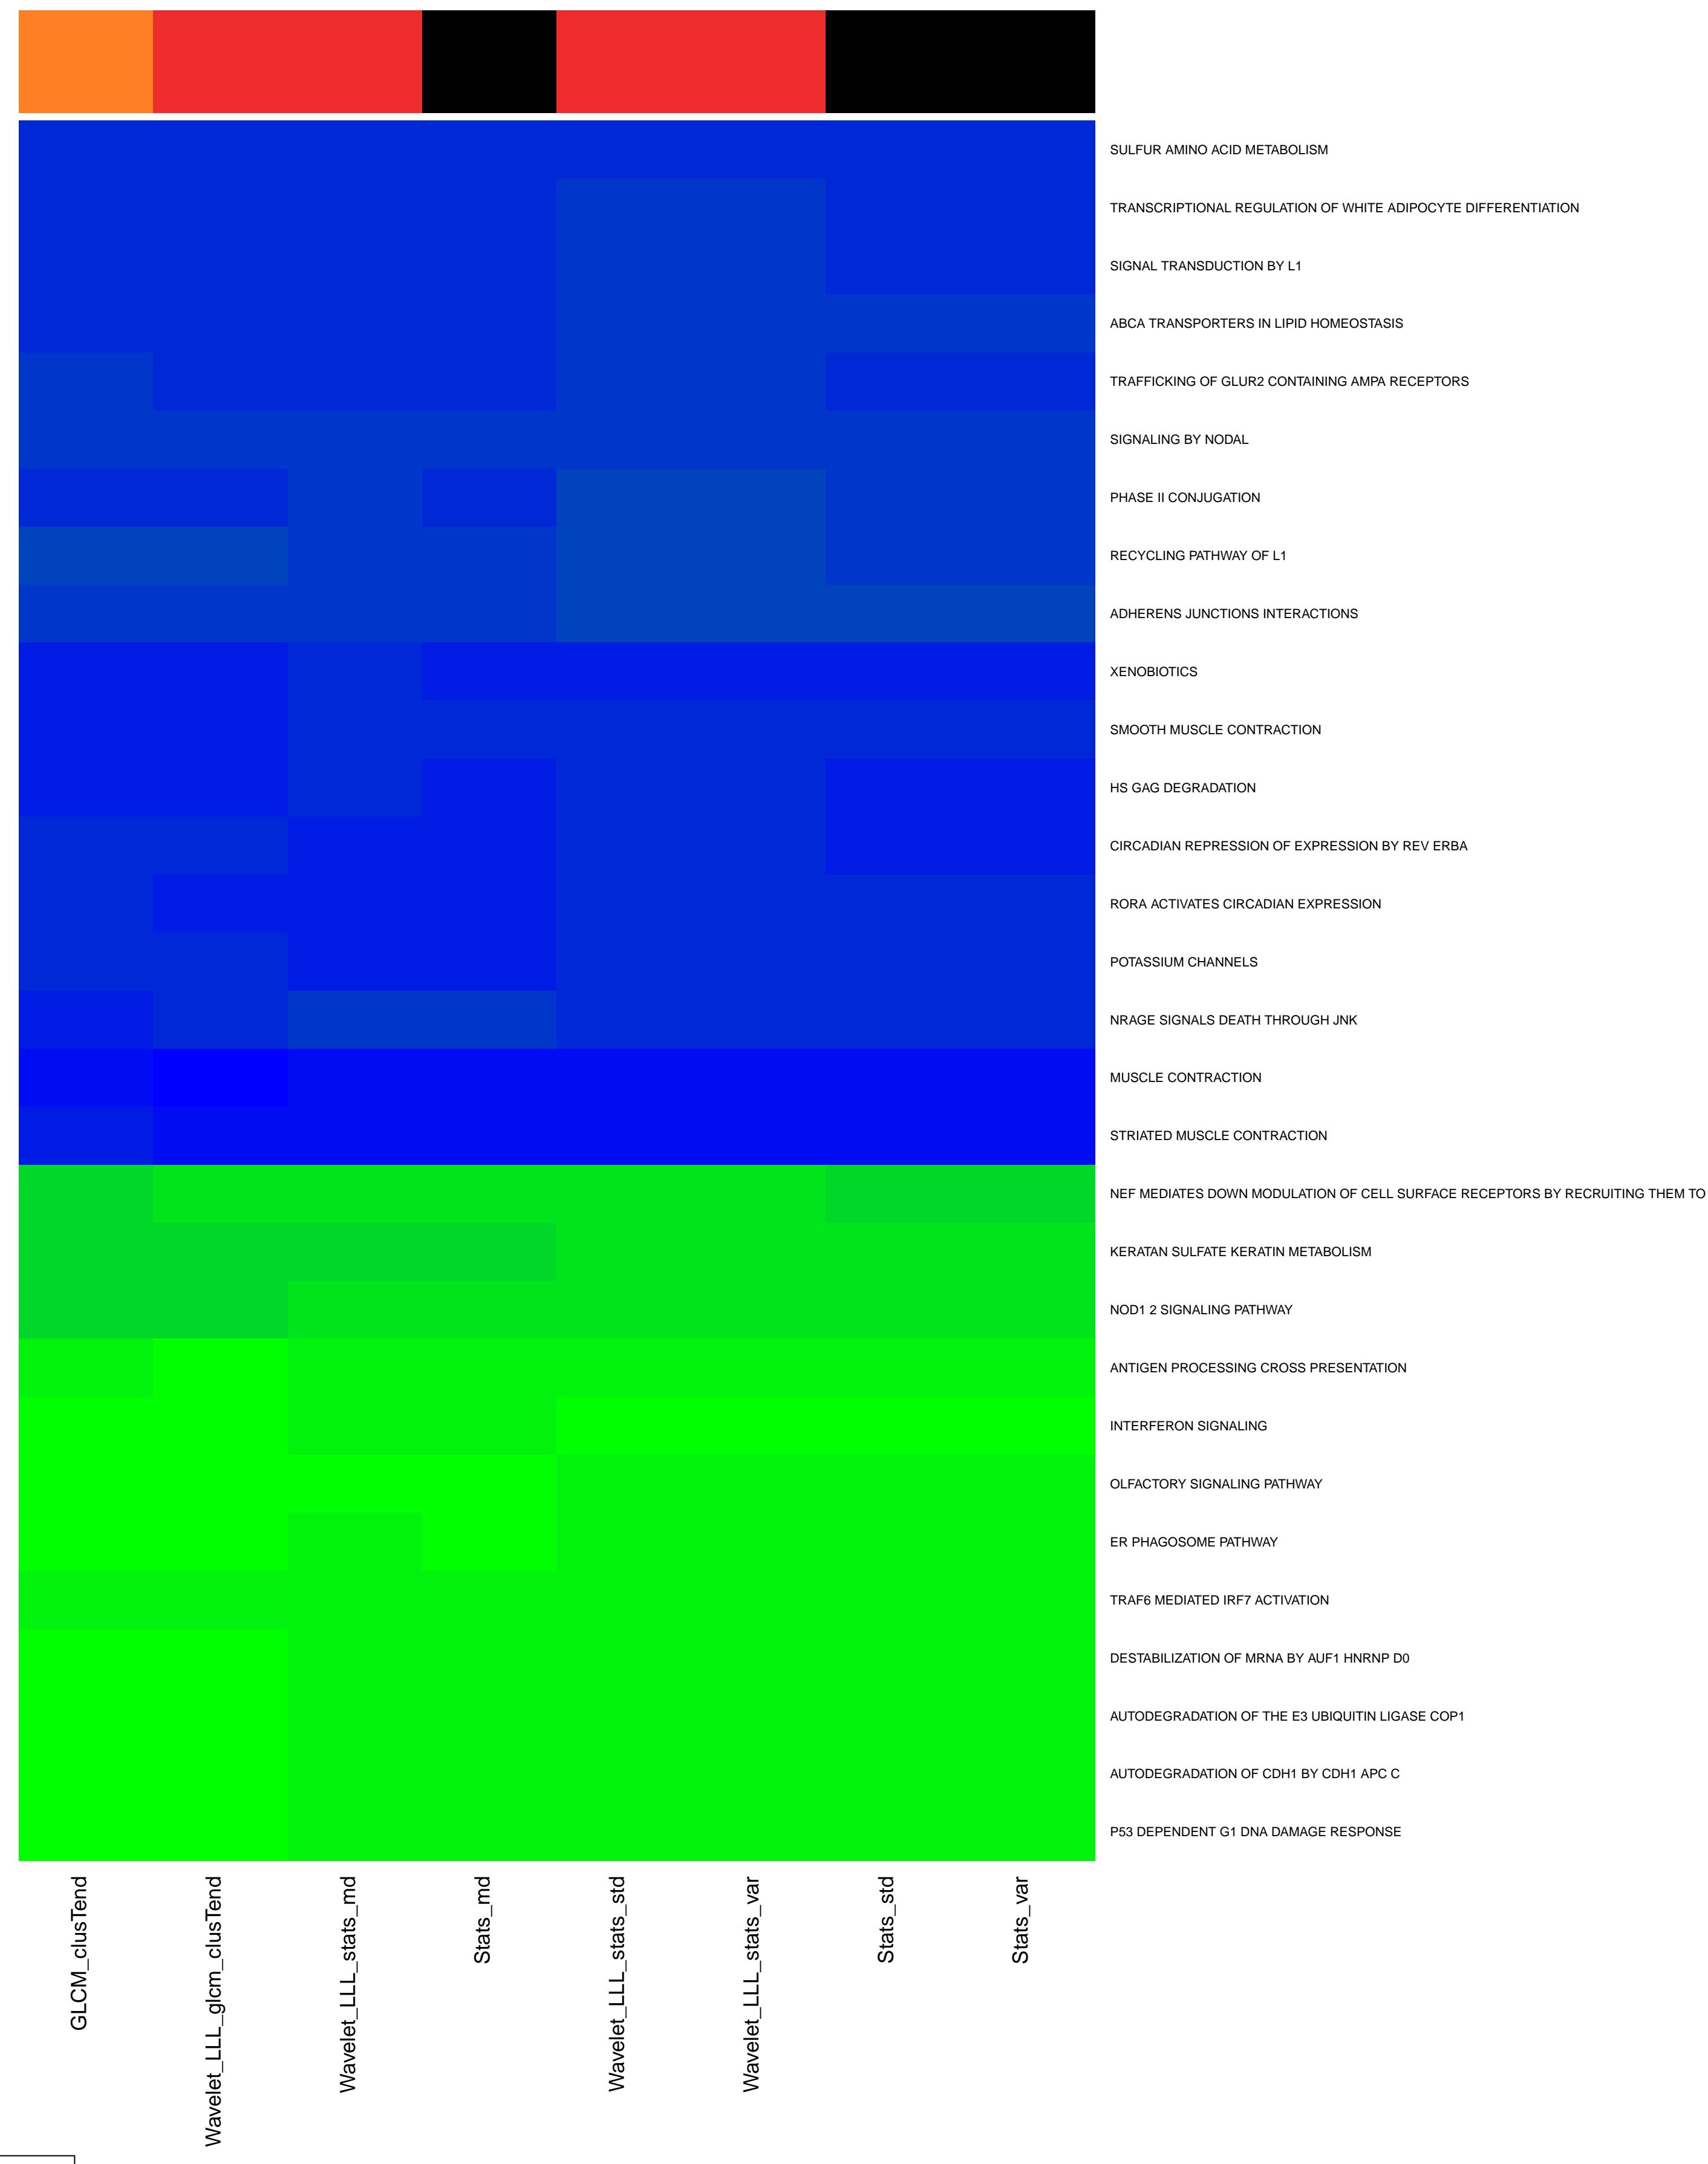

Stats Texture Shape Wavelet LoG

Color Key and Histogram

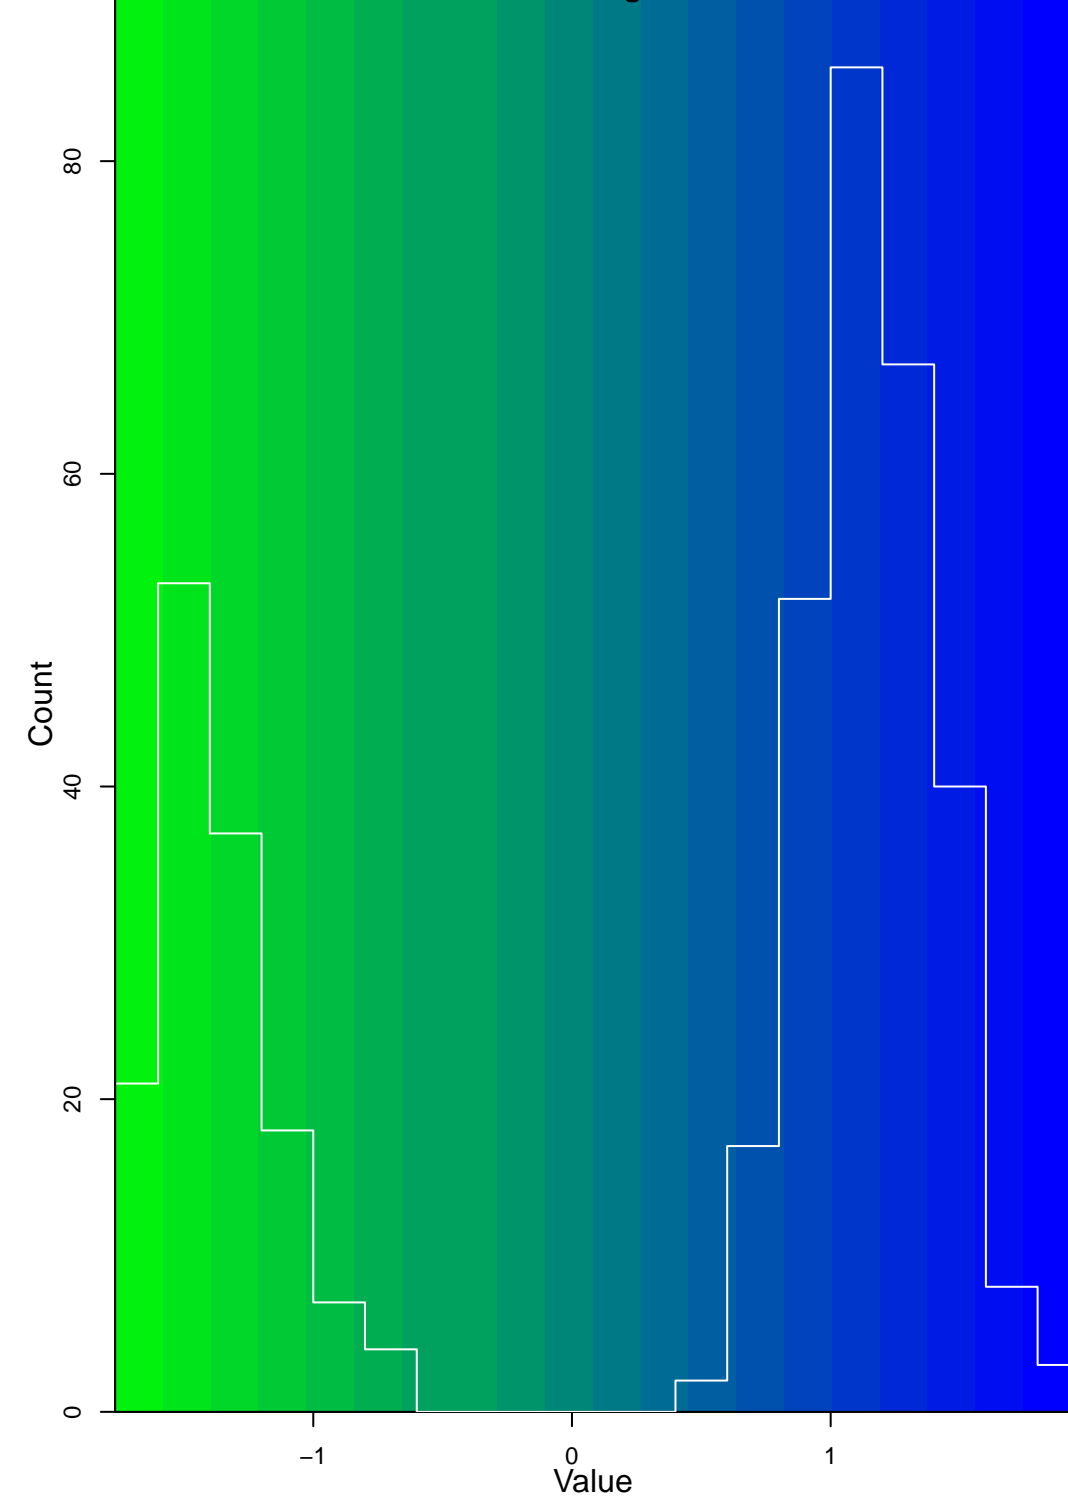

M10\_module10

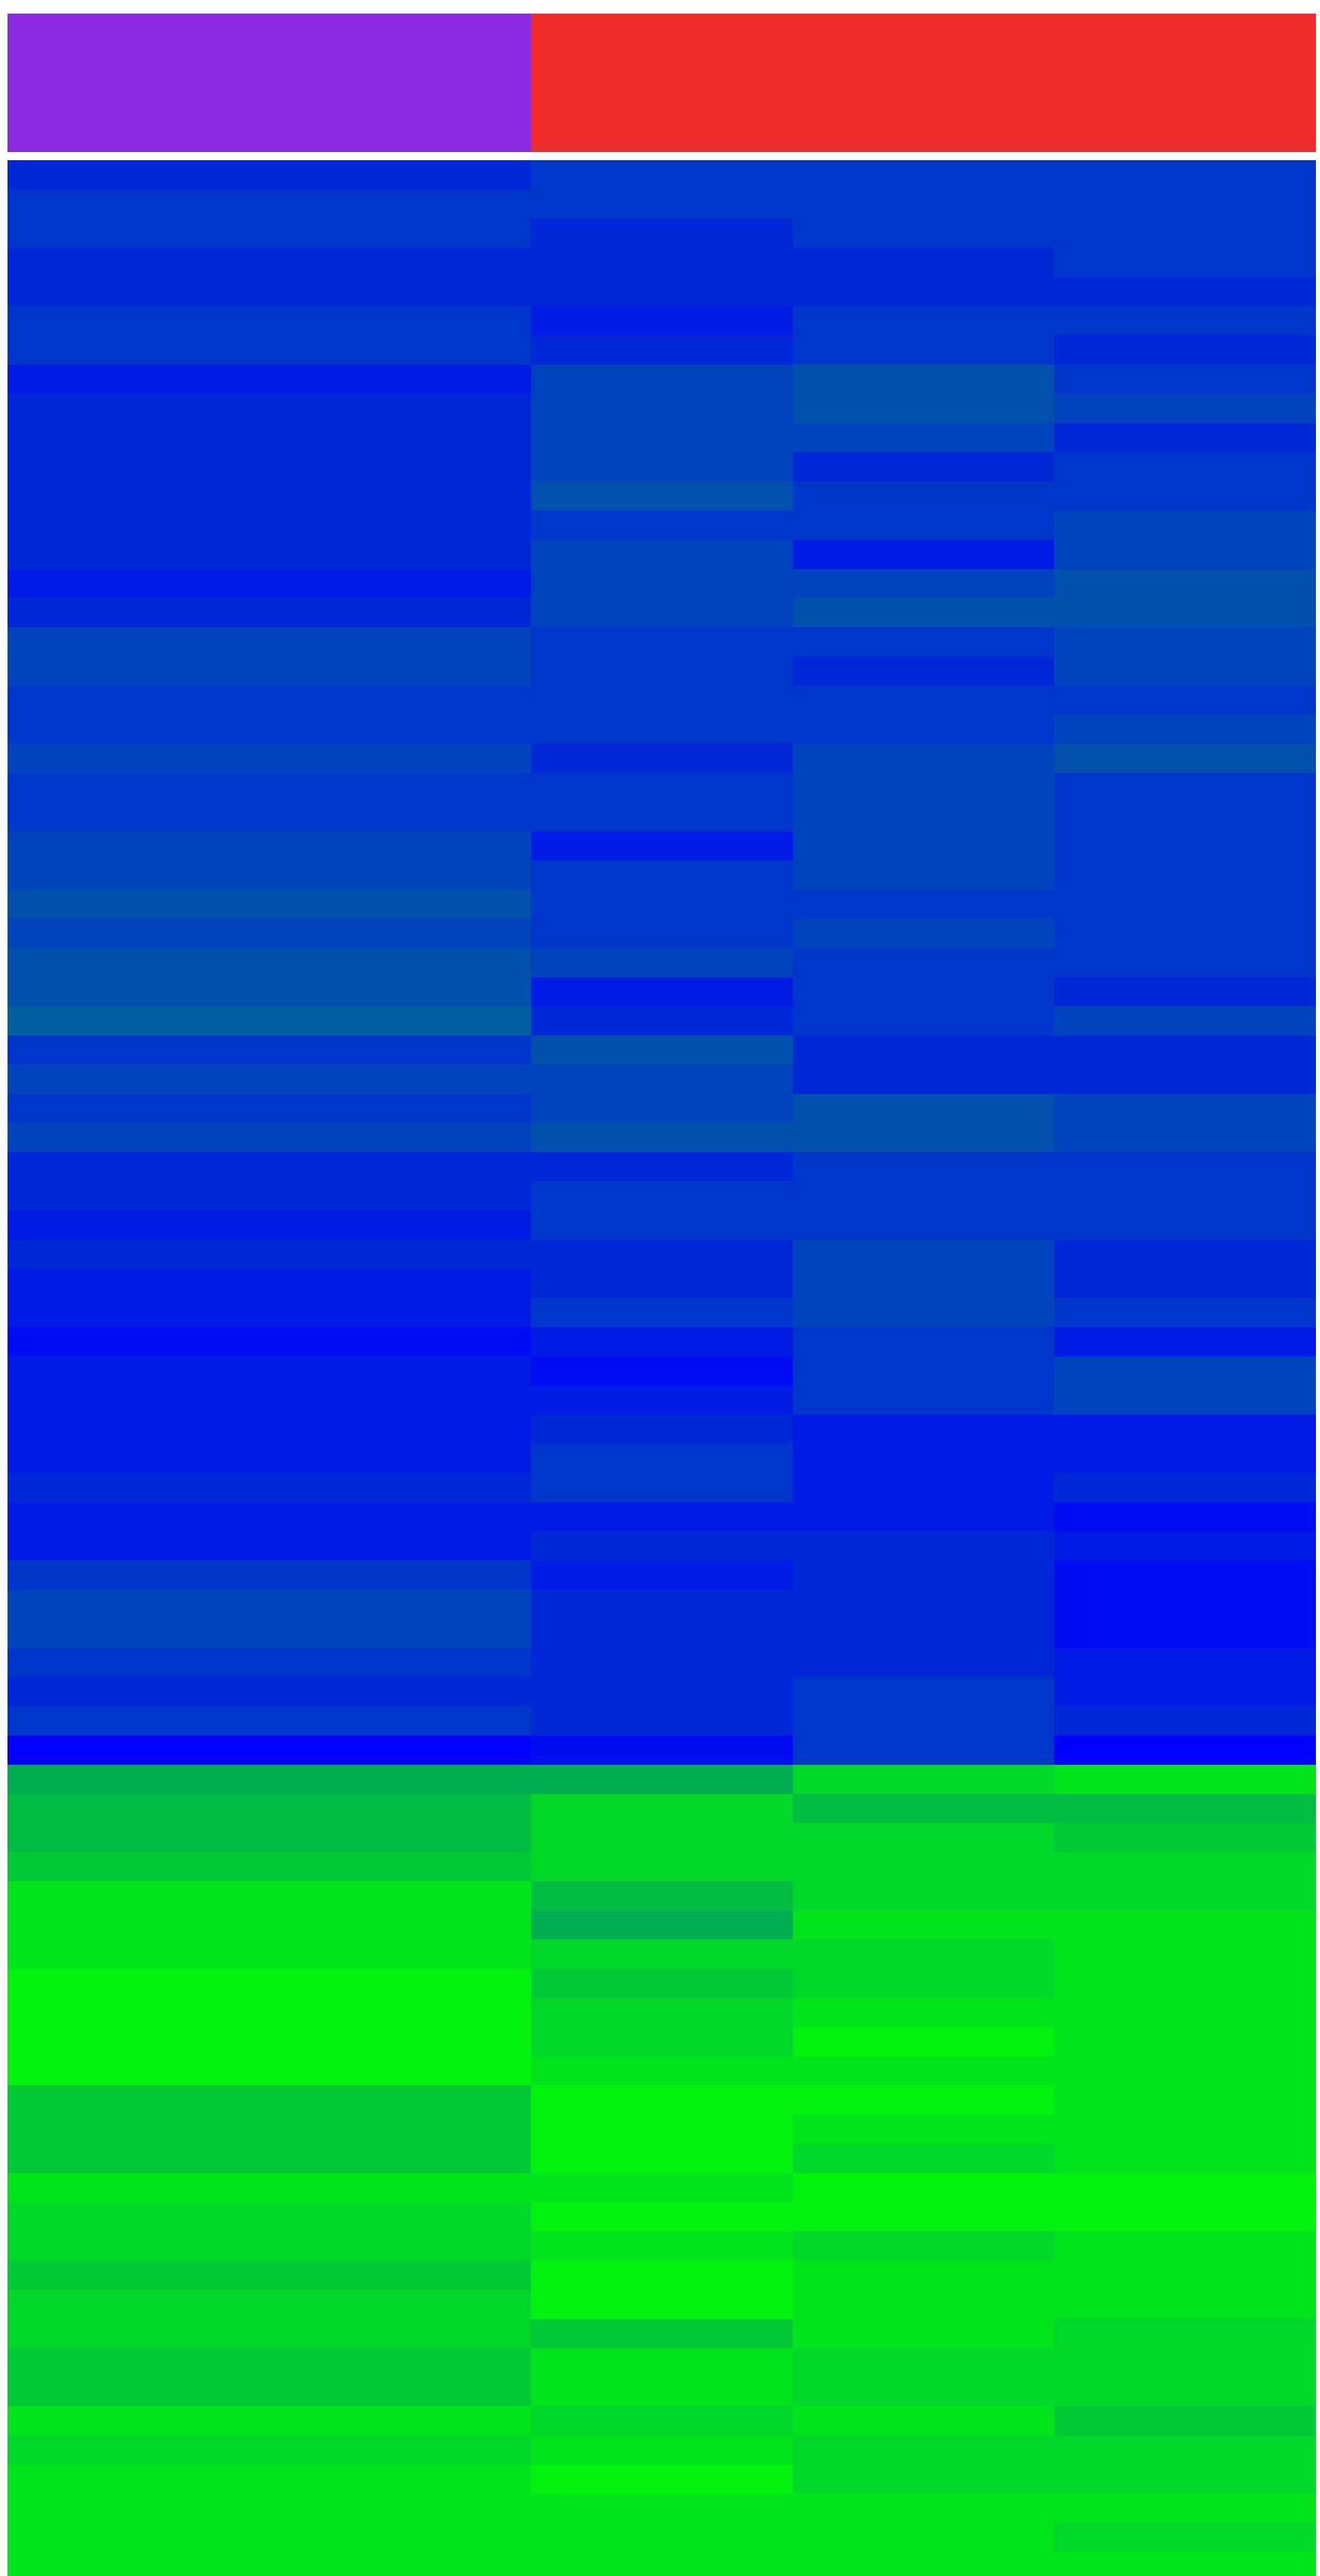

- CD28 DEPENDENT PI3K AKT SIGNALING
- TRAFFICKING OF GILIR2 CONTAINING AMPA RECEPTORS
- UNBLOCKING OF NMDA RECEPTOR GLUTAMATE BINDING AND ACTIVATION
- GOLGI ASSOCIATED VESICLE BIOGENESIS
- TRANS GOLGI NETWORK VESICLE BUDDING
- SYNTHESIS OF PC
- VOLTAGE GATED POTASSIUM CHANNELS
- CTLA4 INHIBITORY SIGNALING
- SIGNALING BY FGFR1 FUSION MUTANTS
- GABA SYNTHESIS RELEASE REUPTAKE AND DEGRADATION
- TRANSPORT OF MATURE TRANSCRIPT TO CYTOPLASM
- FORMATION OF INCISION COMPLEX IN GG NER
- NEUROTRANSMITTER RECEPTOR BINDING AND DOWNSTREAM TRANSMISSION IN THE POSTSYNAPTIC CELL
- AMINO ACID AND OLIGOPEPTIDE SLC TRANSPORTERS
- PI 3K CASCADE
- PI3K EVENTS IN ERBB4 SIGNALING
- ABCA TRANSPORTERS IN LIPID HOMEOSTASIS
- PEROXISOMAL LIPID METABOLISM
- SIGNALING BY FGFR1 MUTANTS
- REGULATION OF SIGNALING BY CBL
- TRAF6 MEDIATED NFKB ACTIVATION
- INTERACTION BETWEEN L1 AND ANKYRINS
- CGMP EFFECTS
- ACYL CHAIN REMODELLING OF PI
- STEROID HORMONES
- METABOLISM OF STEROID HORMONES AND VITAMINS A AND D
- ACTIVATED AMPK STIMULATES FATTY ACID OXIDATION IN MUSCLE
- LATENT INFECTION OF HOMO SAPIENS WITH MYCOBACTERIUM TUBERCULOSIS
- PLATELET CALCIUM HOMEOSTASIS
- SYNTHESIS SECRETION AND INACTIVATION OF GLP1
- INSULIN RECEPTOR RECYCLING
- TRANSFERRIN ENDOCYTOSIS AND RECYCLING
- SIGNALING BY NODAL
- BOTULINUM NEUROTOXICITY
- NEURONAL SYSTEM
- TRANSMISSION ACROSS CHEMICAL SYNAPSES
- TRANSMEMBRANE TRANSPORT OF SMALL MOLECULES
- POTASSIUM CHANNELS
- INWARDLY RECTIFYING K CHANNELS
- NEUROTRANSMITTER RELEASE CYCLE
- GABA RECEPTOR ACTIVATION
- PHOSPHOLIPASE C MEDIATED CASCADE
- FGFR LIGAND BINDING AND ACTIVATION
- ION CHANNEL TRANSPORT
- LIGAND GATED ION CHANNEL TRANSPORT
- BRANCHED CHAIN AMINO ACID CATABOLISM
- LYSOSOME VESICLE BIOGENESIS
- ENERGY DEPENDENT REGULATION OF MTOR BY LKB1 AMPK
- SYNTHESIS OF BILE ACIDS AND BILE SALTS VIA 7ALPHA HYDROXYCHOLESTEROL
- SYNTHESIS OF BILE ACIDS AND BILE SALTS
- BILE ACID AND BILE SALT METABOLISM
- DOWNREGULATION OF SMAD2 3 SMAD4 TRANSCRIPTIONAL ACTIVITY
- SYNTHESIS OF PIP3 AT THE GOLGI MEMBRANE
- TRANSPORT OF VITAMINS NUCLEOSIDES AND RELATED MOLECULES
- GENERIC TRANSCRIPTION PATHWAY
- HS GAG DEGRADATION
- INSULIN SYNTHESIS AND PROCESSING
- NOD1 2 SIGNALING PATHWAY
- NOTCH1 INTRACELLULAR DOMAIN REGULATES TRANSCRIPTION
- DEGRADATION OF THE EXTRACELLULAR MATRIX
- REGULATION OF INSULIN LIKE GROWTH FACTOR IGF ACTIVITY BY INSULIN LIKE GROWTH FACTOR BINDING PROTEINS IGFBS
- ACTIVATION OF KAINATE RECEPTORS UPON GLUTAMATE BINDING
- G PROTEIN BETA GAMMA SIGNALLING
- G BETA GAMMA SIGNALLING THROUGH PLC BETA
- SEMA4D IN SEMAPHORIN SIGNALING
- SEMA4D INDUCED CELL MIGRATION AND GROWTH CONE COLLAPSE
- ARMS MEDIATED ACTIVATION
- METABOLISM OF POLYAMINES
- SIGNALING BY ROBO RECEPTOR
- SIGNALING BY HIPPO
- CHOLESTEROL BIOSYNTHESIS
- YAP1 AND WWTR1 TAZ STIMULATED GENE EXPRESSION
- DOWNREGULATION OF TGF BETA RECEPTOR SIGNALING
- SIGNALING BY CONSTITUTIVELY ACTIVE EGFR
- PRE NOTCH TRANSCRIPTION AND TRANSLATION
- GLYCOSAMINOGLYCAN METABOLISM
- SIGNALLING TO ERKS
- SMOOTH MUSCLE CONTRACTION
- BMAL1 CLOCK NPAS2 ACTIVATES CIRCADIAN EXPRESSION
- CIRCADIAN CLOCK
- SIGNALLING TO RAS
- ACTIVATED TAK1 MEDIATES P38 MAPK ACTIVATION
- ENDOSOMAL SORTING COMPLEX REQUIRED FOR TRANSPORT ESCRT

Shape\_compactness2  
Shape\_sphericity  
Wavelet\_HHL\_rigl\_longRunLowGrayLevEmpha  
Wavelet\_LLH\_rigl\_longRunLowGrayLevEmpha  
Wavelet\_HHL\_rigl\_longRunLowGrayLevEmpha

Stats
  Texture
  Shape
  Wavelet
  LoG

Color Key and Histogram

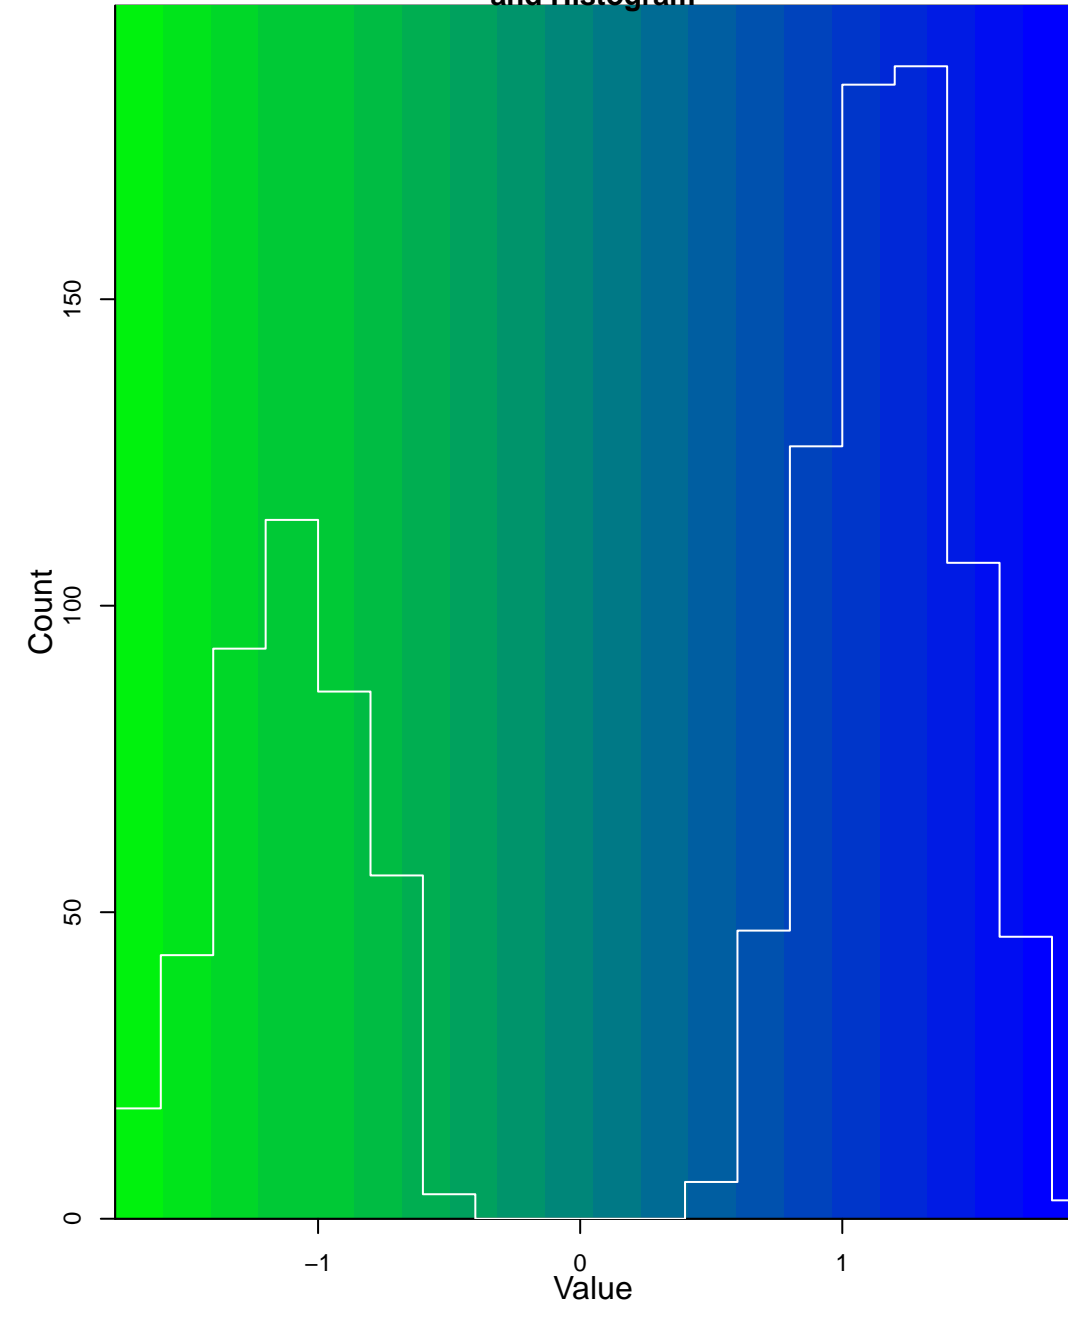

M11\_module11

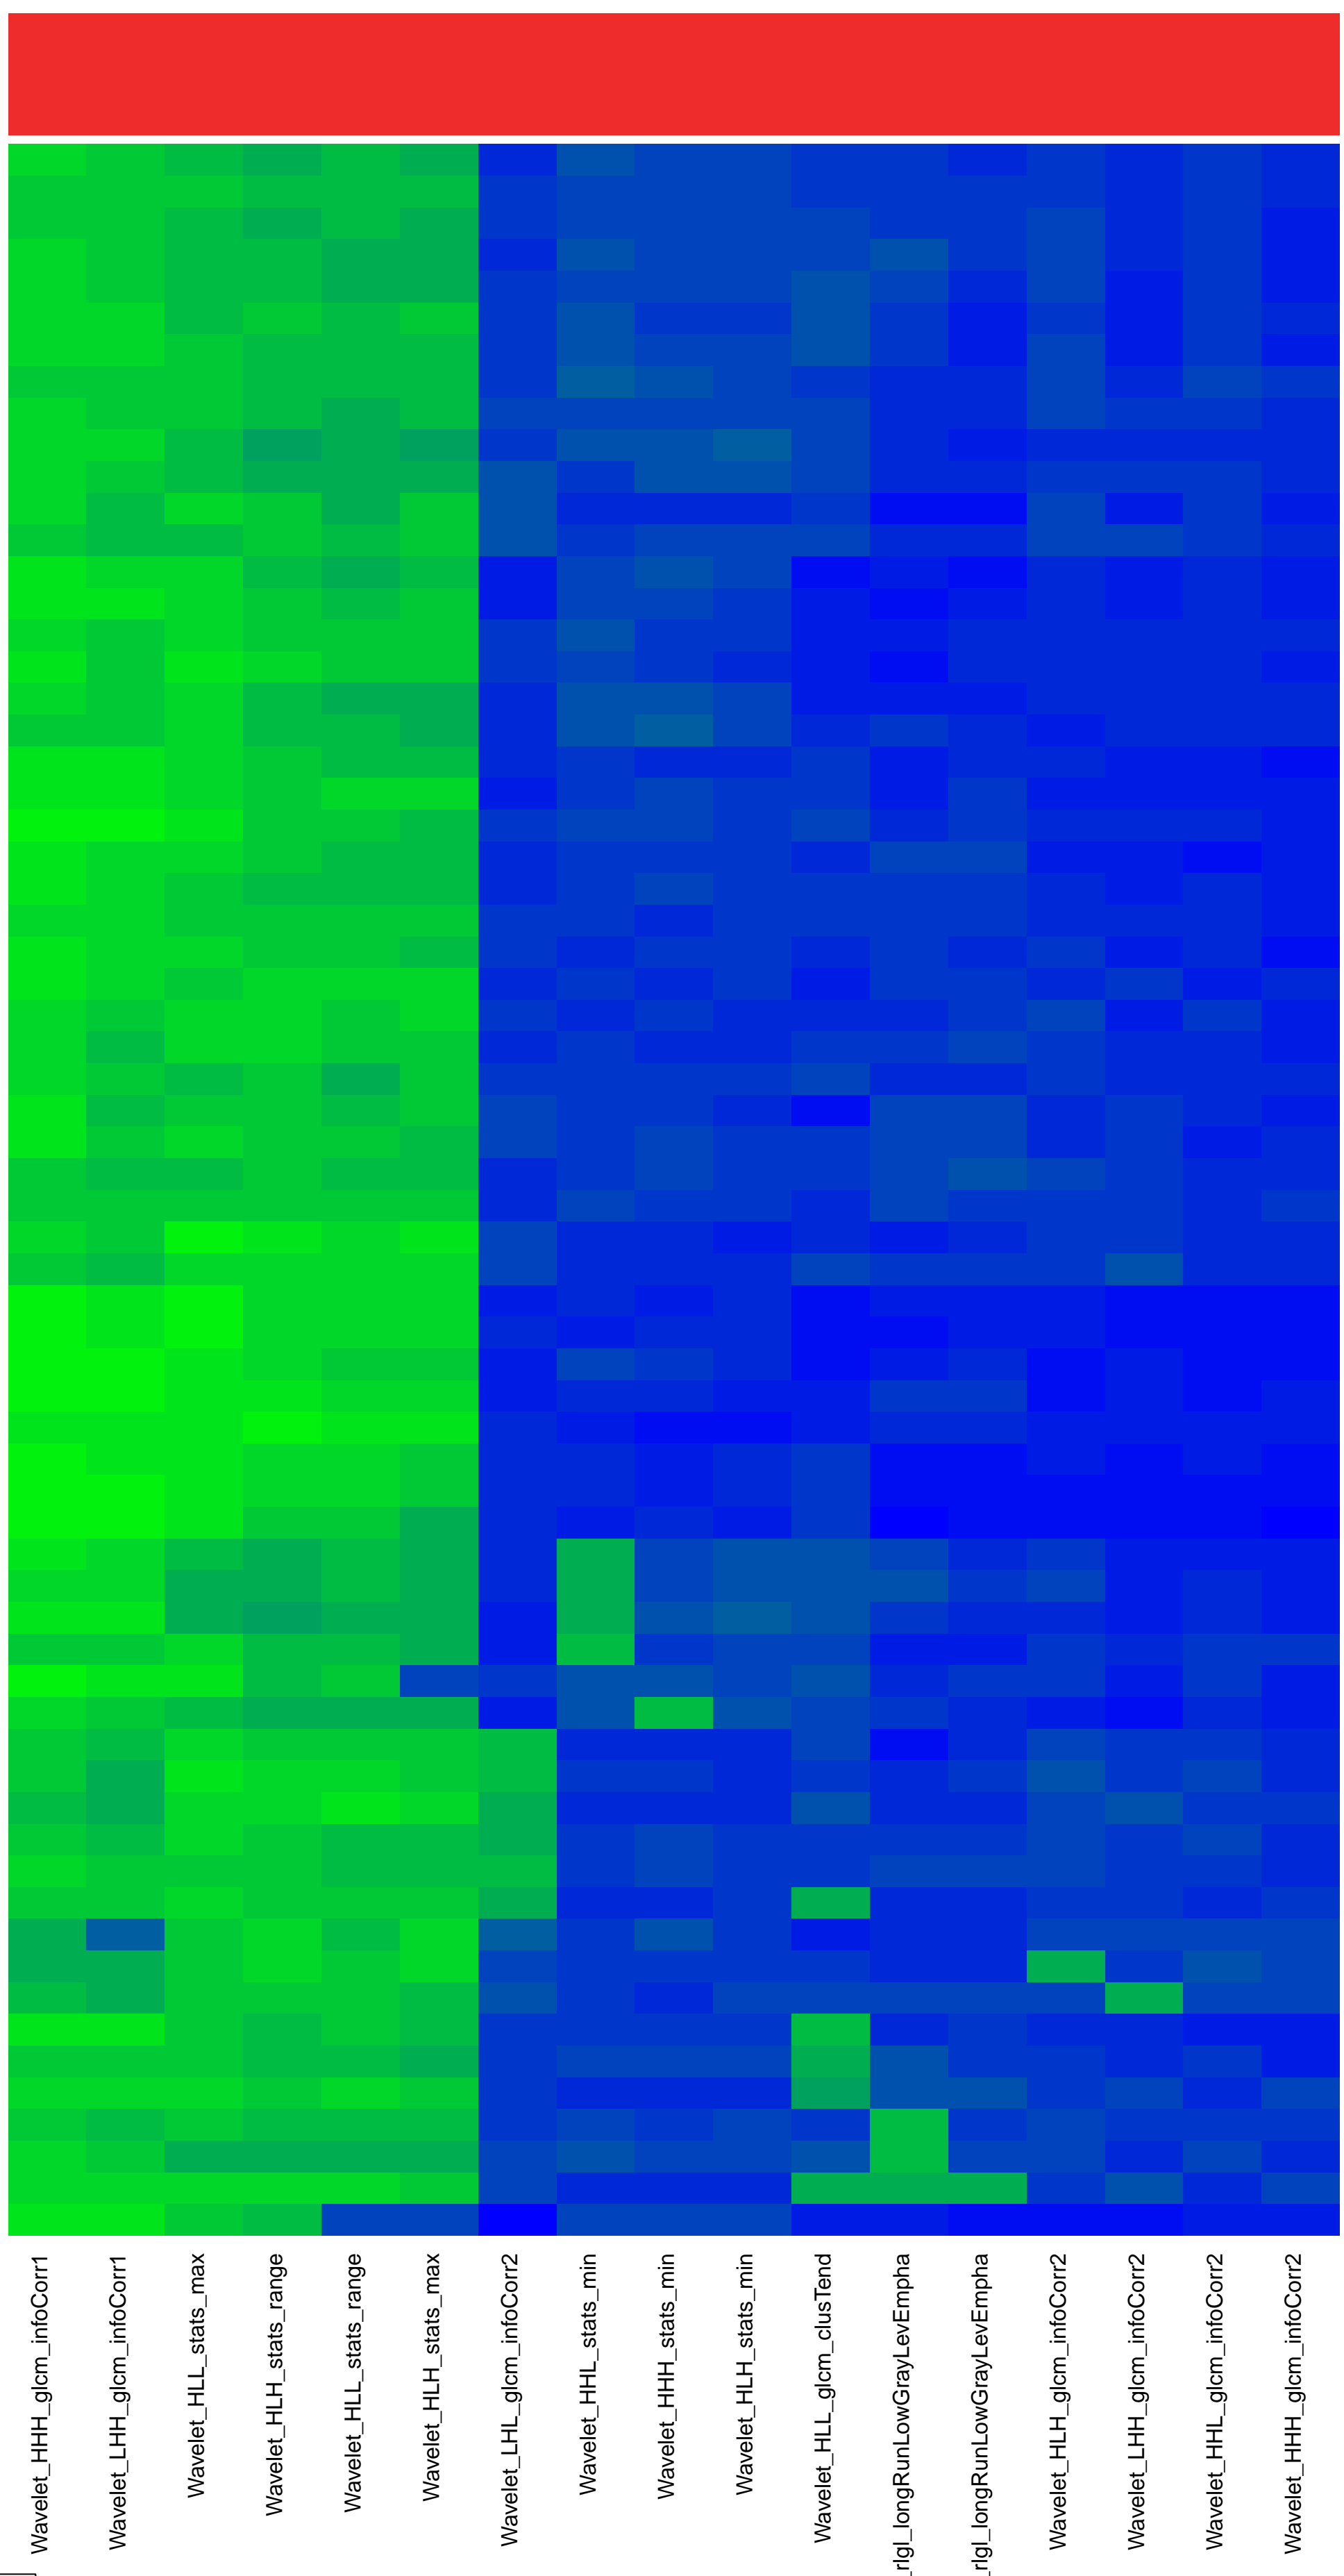

- NEURONAL SYSTEM
- TRANSMISSION ACROSS CHEMICAL SYNAPSES
- IL RECEPTOR SHC SIGNALING
- GLUCAGON SIGNALING IN METABOLIC REGULATION
- G ALPHA Z SIGNALLING EVENTS
- GABA RECEPTOR ACTIVATION
- GABA B RECEPTOR ACTIVATION
- TRANSPORT OF VITAMINS NUCLEOSIDES AND RELATED MOLECULES
- CA DEPENDENT EVENTS
- ACYL CHAIN REMODELLING OF PI
- PRE NOTCH PROCESSING IN GOLGI
- COMPLEMENT CASCADE
- LIPID DIGESTION MOBILIZATION AND TRANSPORT
- PHOSPHOLIPASE C MEDIATED CASCADE
- DAG AND IP3 SIGNALING
- SYNTHESIS OF BILE ACIDS AND BILE SALTS
- BILE ACID AND BILE SALT METABOLISM
- SYNTHESIS OF BILE ACIDS AND BILE SALTS VIA 7ALPHA HYDROXYCHOLESTEROL
- UNBLOCKING OF NMDA RECEPTOR GLUTAMATE BINDING AND ACTIVATION
- ANTIGEN ACTIVATES B CELL RECEPTOR LEADING TO GENERATION OF SECOND MESSENGERS
- INTERACTION BETWEEN L1 AND ANKYRINS
- CGMP EFFECTS
- PLATELET AGGREGATION PLUG FORMATION
- INTEGRATION OF ENERGY METABOLISM
- SIGNALING BY RHO GTPASES
- G ALPHA S SIGNALLING EVENTS
- TRAFFICKING OF GLUR2 CONTAINING AMPA RECEPTORS
- ACTIVATED AMPK STIMULATES FATTY ACID OXIDATION IN MUSCLE
- MUSCLE CONTRACTION
- RAP1 SIGNALLING
- NUCLEAR RECEPTOR TRANSCRIPTION PATHWAY
- INTEGRIN ALPHAIIA BETA3 SIGNALING
- STRIATED MUSCLE CONTRACTION
- TRAFFICKING OF AMPA RECEPTORS
- ENDOGENOUS STEROLS
- HDL MEDIATED LIPID TRANSPORT
- INTRINSIC PATHWAY
- FORMATION OF FIBRIN CLOT CLOTTING CASCADE
- ABC FAMILY PROTEINS MEDIATED TRANSPORT
- ABCA TRANSPORTERS IN LIPID HOMEOSTASIS
- EFFECTS OF PIP2 HYDROLYSIS
- PHOSPHORYLATION OF CD3 AND TCR ZETA CHAINS
- PD1 SIGNALING
- IMMUNOREGULATORY INTERACTIONS BETWEEN A LYMPHOID AND A NON LYMPHOID CELL
- INWARDLY RECTIFYING K CHANNELS
- INHIBITION OF VOLTAGE GATED CA2 CHANNELS VIA GBETA GAMMA SUBUNITS
- POTASSIUM CHANNELS
- LYSOSOME VESICLE BIOGENESIS
- NITRIC OXIDE STIMULATES GUANYLATE CYCLASE
- ACTIVATED NOTCH1 TRANSMITS SIGNAL TO THE NUCLEUS
- RIG I MDA5 MEDIATED INDUCTION OF IFN ALPHA BETA PATHWAYS
- STEROID HORMONES
- LIPOPROTEIN METABOLISM
- METABOLISM OF STEROID HORMONES AND VITAMINS A AND D
- PLC BETA MEDIATED EVENTS
- NEGATIVE REGULATORS OF RIG I MDA5 SIGNALING
- XENOBIOTICS
- ENERGY DEPENDENT REGULATION OF MTOR BY LKB1 AMPK
- RECYCLING PATHWAY OF L1
- GENERATION OF SECOND MESSENGER MOLECULES
- CD28 DEPENDENT PI3K AKT SIGNALING
- BOTULINUM NEUROTOXICITY
- NEUROTRANSMITTER RECEPTOR BINDING AND DOWNSTREAM TRANSMISSION IN THE POSTSYNAPTIC CELL
- INHIBITION OF INSULIN SECRETION BY ADRENALINE NORADRENALINE
- PROTEOLYTIC CLEAVAGE OF SNARE COMPLEX PROTEINS
- GENERIC TRANSCRIPTION PATHWAY

Stats
  Texture
  Shape
  Wavelet
  LoG

Color Key  
and Histogram

### M12\_module12

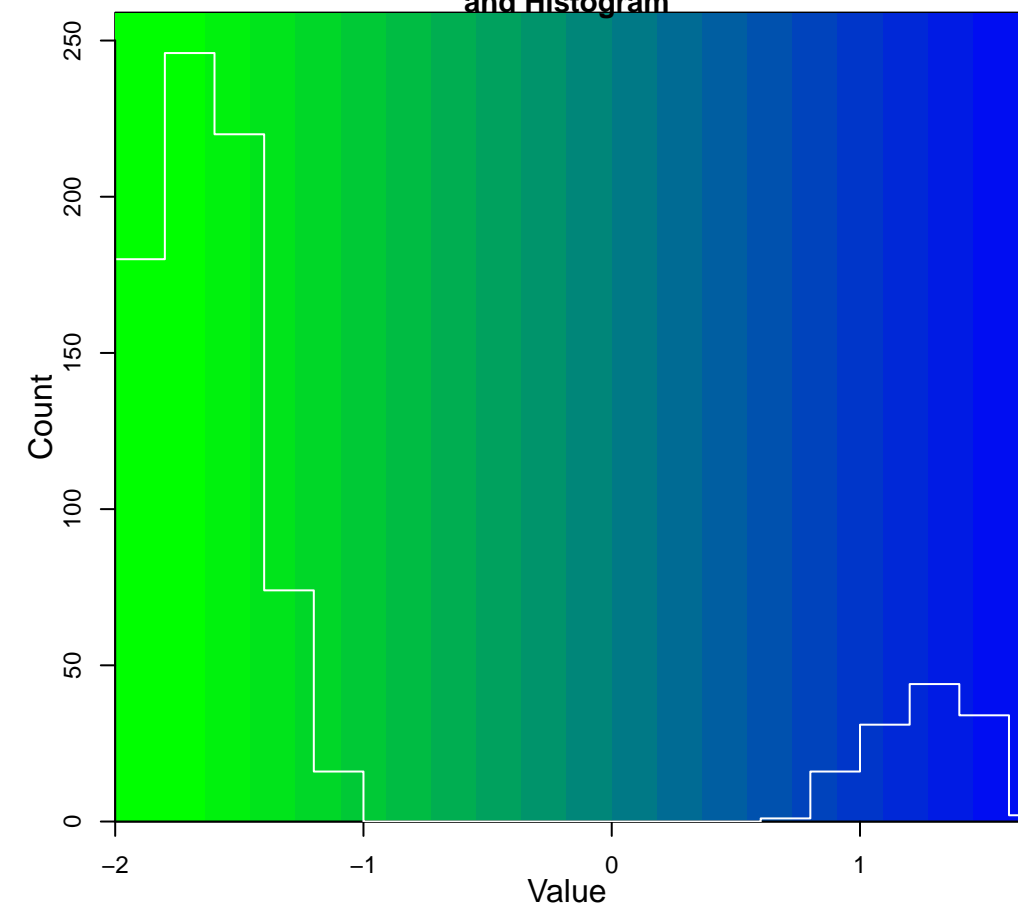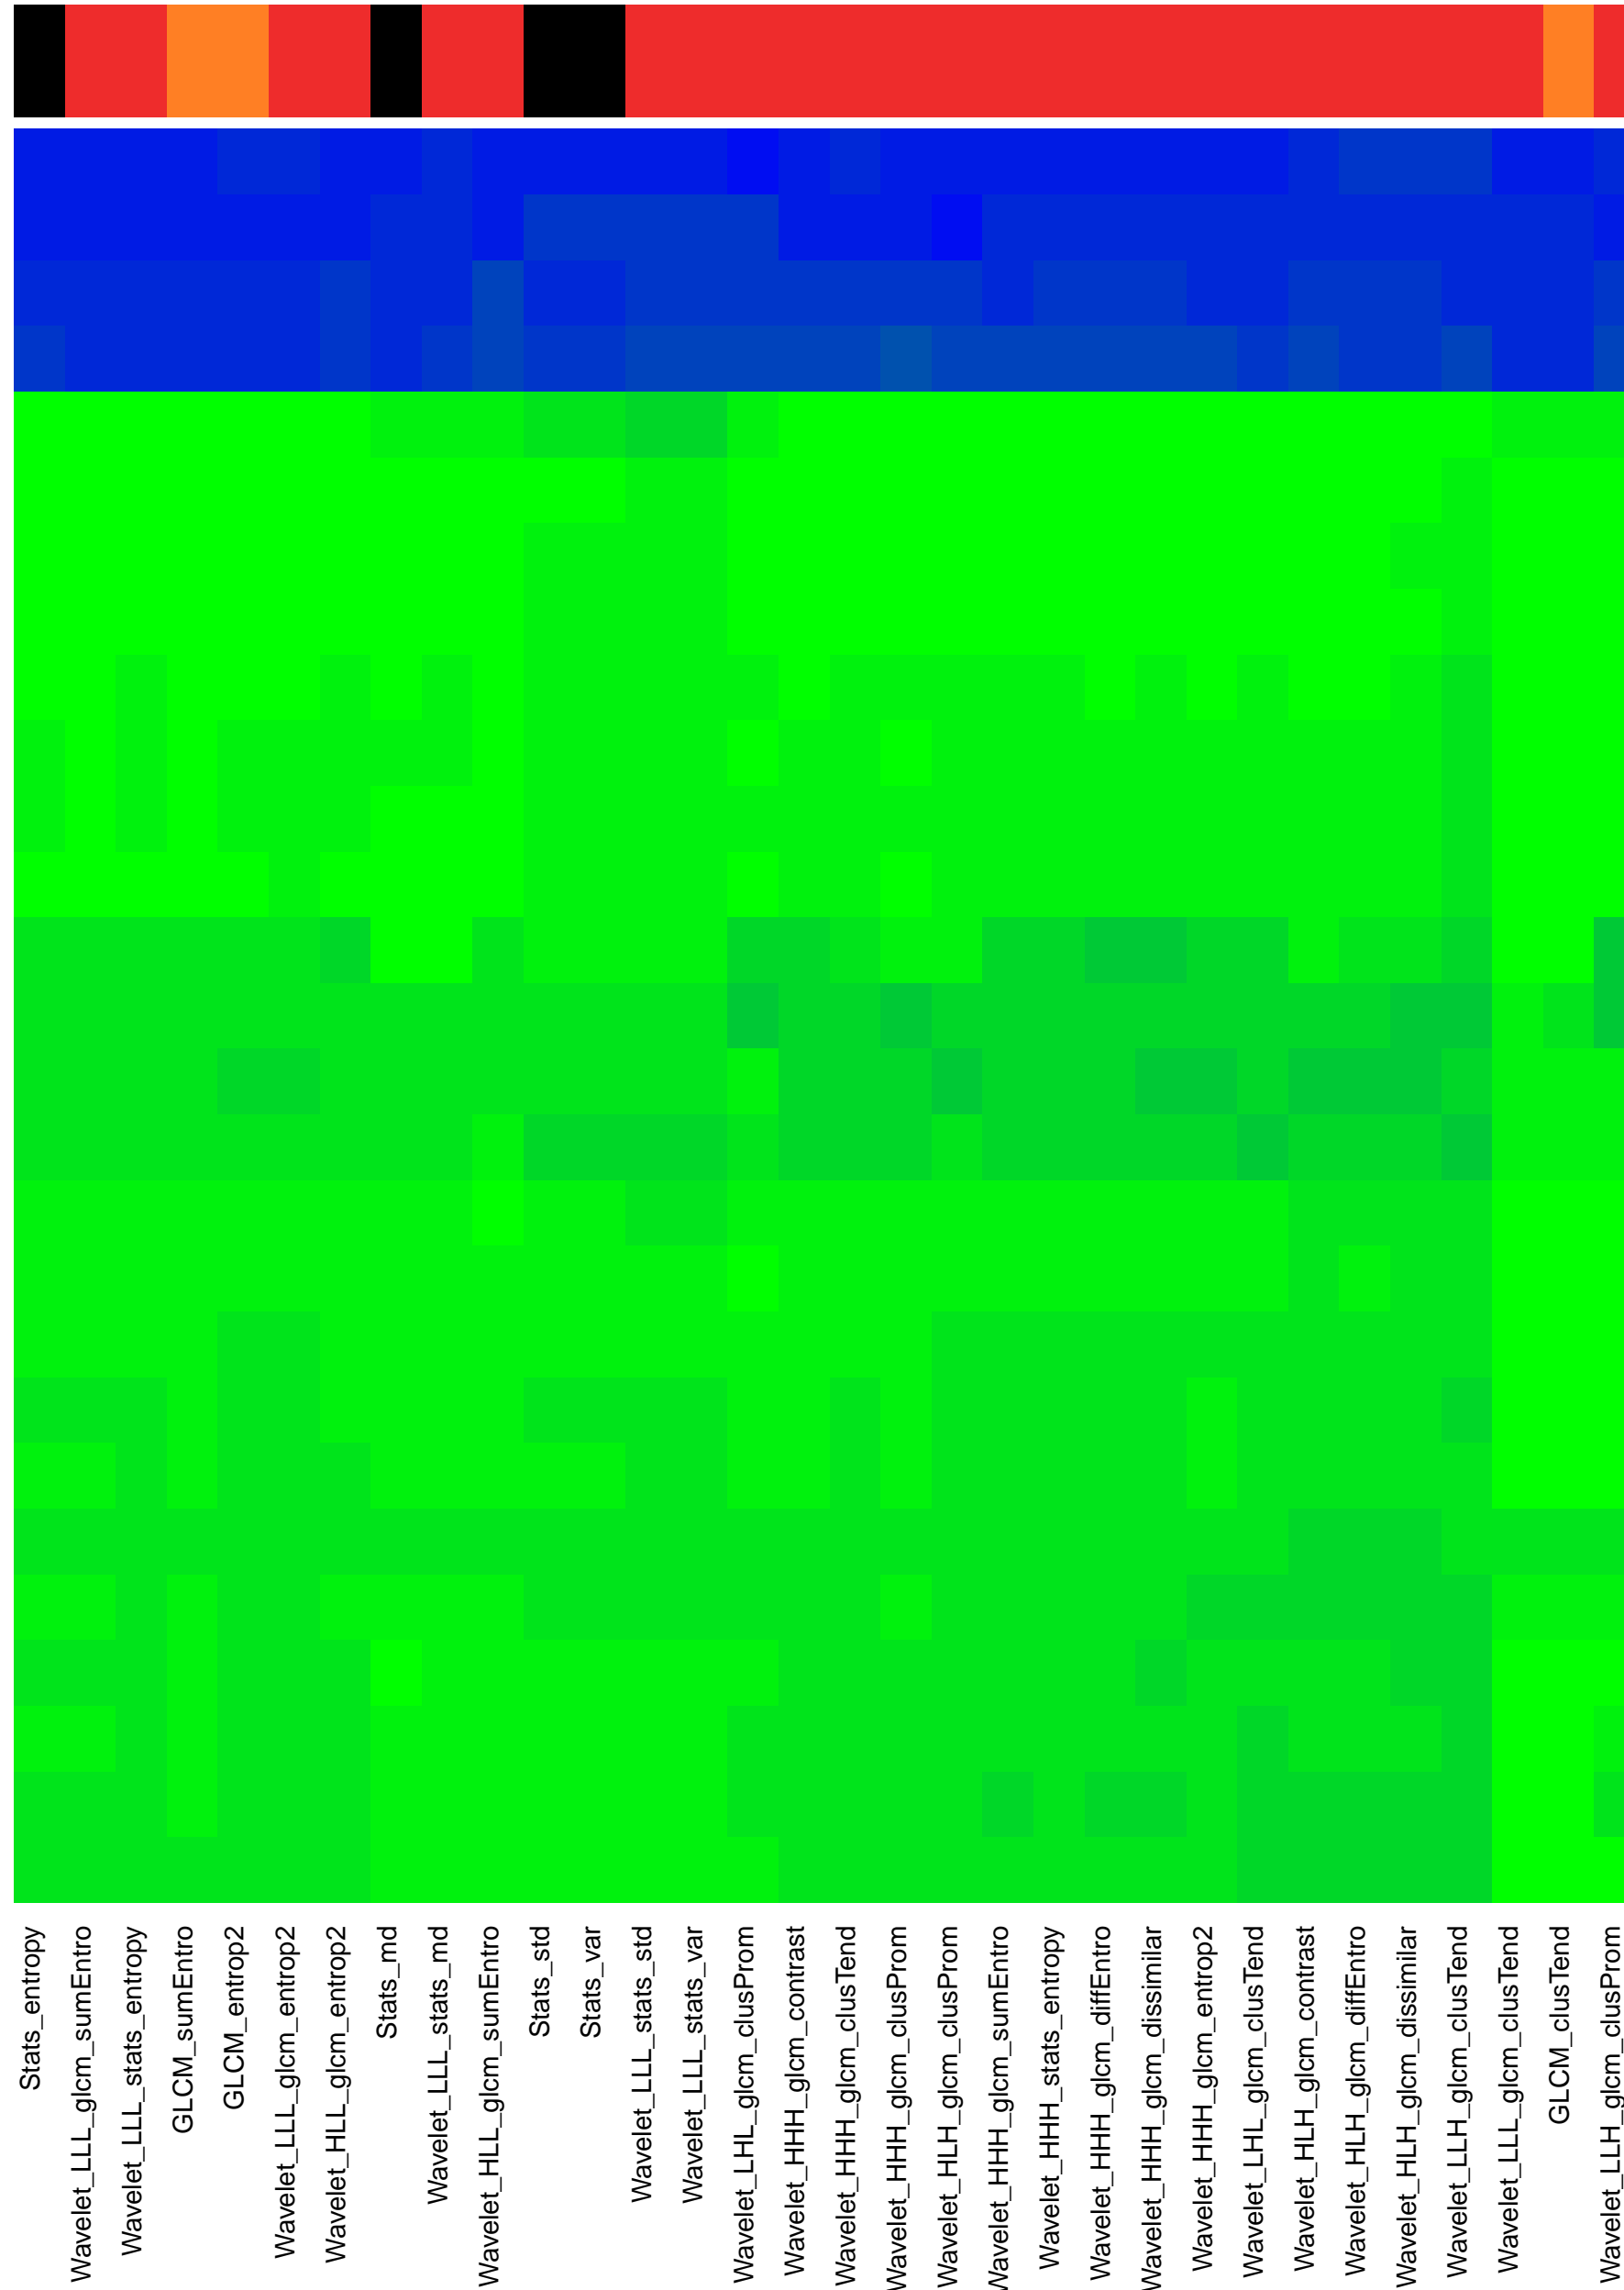

- XENOBIOTICS
- ABCA TRANSPORTERS IN LIPID HOMEOSTASIS
- SIGNAL TRANSDUCTION BY L1
- PHASE II CONJUGATION
- G0 AND EARLY G1
- REGULATION OF MITOTIC CELL CYCLE
- ORC1 REMOVAL FROM CHROMATIN
- ASSEMBLY OF THE PRE REPLICATIVE COMPLEX
- APC C CDH1 MEDIATED DEGRADATION OF CDC20 AND OTHER APC C CDH1 TARGETED PROTEIN
- CDT1 ASSOCIATION WITH THE CDC6 ORC ORIGIN COMPLEX
- APC C CDC20 MEDIATED DEGRADATION OF MITOTIC PROTEINS
- CYCLIN E ASSOCIATED EVENTS DURING G1 S TRANSITION
- OLFACTORY SIGNALING PATHWAY
- ANTIVIRAL MECHANISM BY IFN STIMULATED GENES
- ACTIVATION OF NF KAPPAB IN B CELLS
- REGULATION OF ORNITHINE DECARBOXYLASE ODC
- SCFSKP2 MEDIATED DEGRADATION OF P27 P21
- P53 INDEPENDENT G1 S DNA DAMAGE CHECKPOINT
- P53 DEPENDENT G1 DNA DAMAGE RESPONSE
- CDK MEDIATED PHOSPHORYLATION AND REMOVAL OF CDC6
- SCF BETA TRCP MEDIATED DEGRADATION OF EMI1
- FACTORS INVOLVED IN MEGAKARYOCYTE DEVELOPMENT AND PLATELET PRODUCTION
- REGULATION OF MRNA STABILITY BY PROTEINS THAT BIND AU RICH ELEMENTS
- ER PHAGOSOME PATHWAY
- AUTODEGRADATION OF CDH1 BY CDH1 APC C
- DESTABILIZATION OF MRNA BY AUF1 HNRNP D0
- AUTODEGRADATION OF THE E3 UBIQUITIN LIGASE COP1

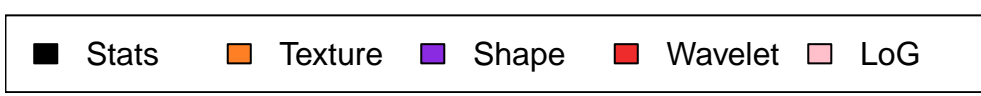

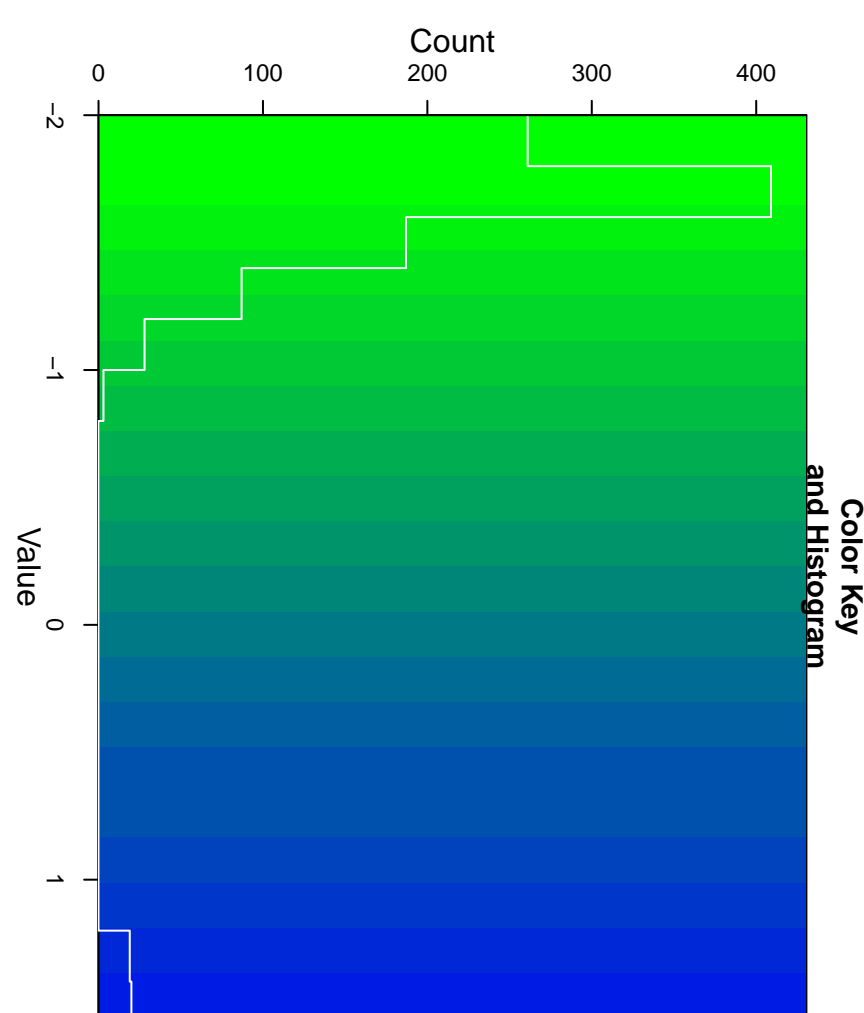

### M13\_module13

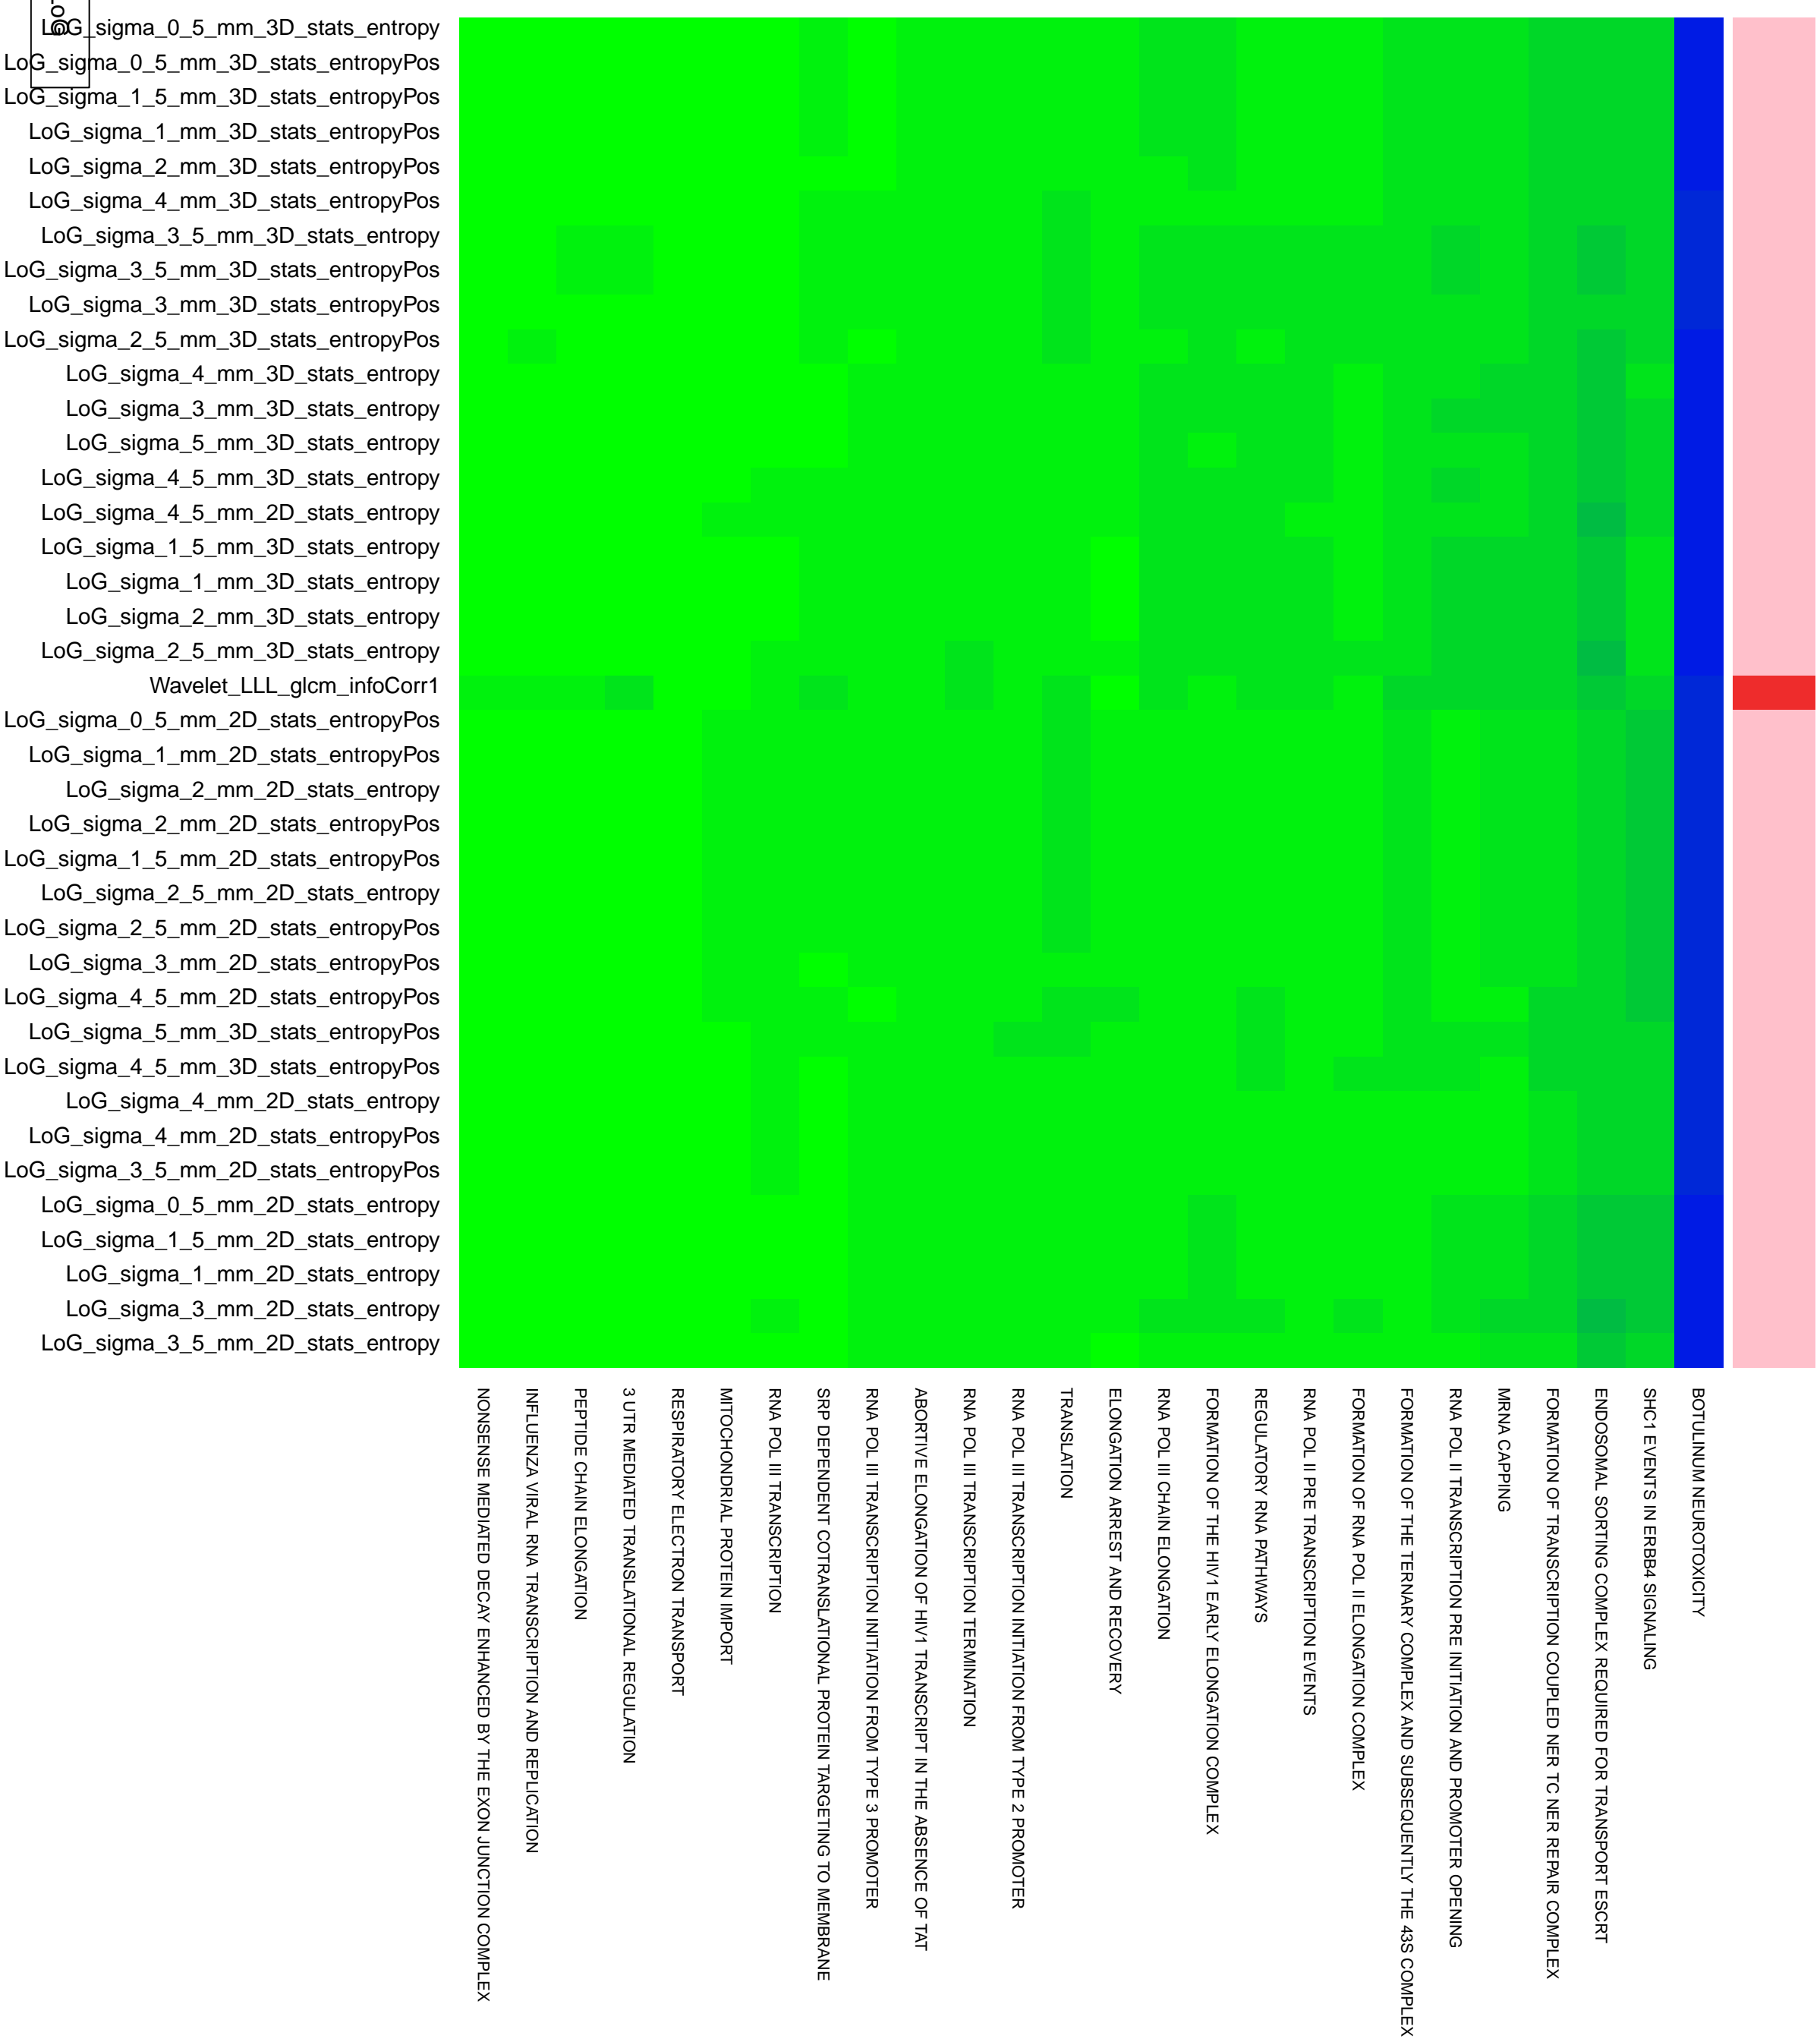

Supplement: elife-23421-fig3-data1.pdf [file elife-23421-fig3-data1.pdf]
